# Supplementary material for: Synthesis, characterization, and photophysical properties of novel 9‑phenyl-9-phosphafluorene oxide derivatives
Source: publisher site journal article supplement (doi:10.3762/bjoc.20.274), 2024-12-30

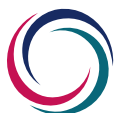

## Supporting Information

for

### **Synthesis, characterization, and photophysical properties of novel 9-phenyl-9-phosphafluorene oxide derivatives**

Shuxian Qiu, Duan Dong, Jiahui Li, Huiting Wen, Jinpeng Li, Yu Yang, Shengxian Zhai and Xingyuan Gao

*Beilstein J. Org. Chem.* **2024**, *20*, 3299–3305. [doi:10.3762/bjoc.20.274](https://doi.org/10.3762/bjoc.20.274)

### **General information, experimental procedures, characterization data, and copies of spectra**

## Table of contents

- Materials and methods
- Synthesis of 2,8-difluoro-5-phenylbenzo[*b*]phosphindole 5-oxide (**5**)
- General procedure for the synthesis of PhFLOP-based molecules **7**
- $^1\text{H}$ ,  $^{13}\text{C}$ ,  $^{19}\text{F}$  and  $^{31}\text{P}$  NMR spectra
- IR spectra

- **Materials and methods**

All reactions were carried out under nitrogen atmosphere with dry solvents under anhydrous conditions, unless otherwise noted. All the chemicals were purchased commercially, and used without further purification. Thin-layer chromatography (TLC) was conducted with 0.25 mm Tsingdao silica gel plates (60F-254) and visualized by exposure to UV light (254 nm) or stained with potassium permanganate. Flash column chromatography was performed on Tsingdao silica gel (200–300 mesh).  $^1\text{H}$  NMR spectra were recorded on Bruker spectrometers (at 400 MHz) and reported relative to deuterated solvent signals or tetramethylsilane internal standard signals. Data for  $^1\text{H}$  NMR spectra were reported as follows: chemical shift ( $\delta/\text{ppm}$ ), multiplicity (s = singlet, d = doublet, t = triplet, q = quartet, m = multiplet, br = broad.), coupling constant (J/Hz) and integration.  $^{13}\text{C}$  NMR spectra were recorded on Bruker Spectrometers (100 MHz). Data for  $^{13}\text{C}$  NMR,  $^{19}\text{F}$  NMR, and  $^{31}\text{P}$  NMR spectra were reported in terms of chemical shift. X-ray diffraction was performed on Bruker APEX-II CCD diffractometer using graphite monochromated Mo  $K\alpha$  radiation at a temperature of  $296 \pm 2$  K. Ultraviolet–visible (UV–vis) spectra were recorded on a SHIMADU UV2600 spectrophotometer. The photoluminescent spectra were measured on a HITACHI F-7000 spectrophotometer. Lifetimes of compounds **7** were measured using an Edinburgh FLS1000 Photoluminescence Spectrometer. Absolute photoluminescence quantum yields (PLQYs) of solution samples were obtained using an integrating sphere. High-resolution mass spectrometry (HRMS) was conducted on Bruker Apex IV RTMS.

• **Synthesis of 2,8-difluoro-5-phenylbenzo[*b*]phosphindole 5-oxide (5)**

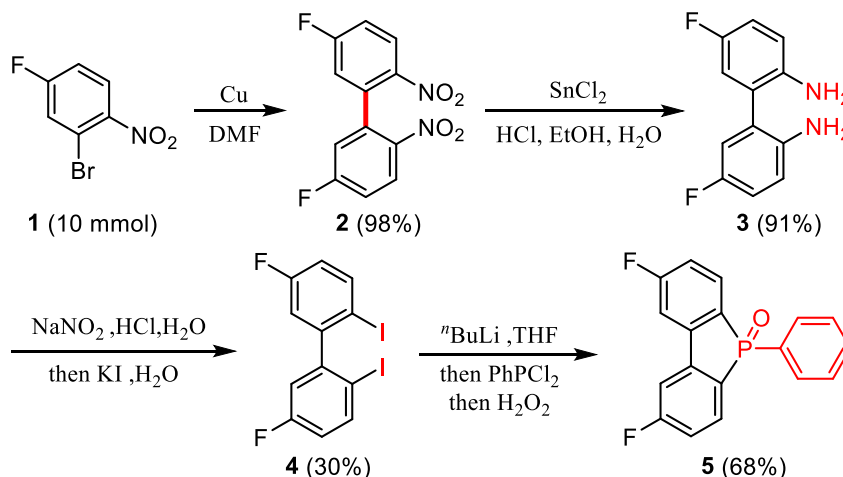

The synthesis of 5,5'-difluoro-2,2'-dinitro-1,1'-biphenyl (**2**): a solution of 2-bromo-4-fluoro-1-nitrobenzene (**1**, 2.189 g, 10 mmol, 1.0 equiv) and copper powder (1.4 g, 22 mmol, 2.2 equiv) in DMF (15 mL) was stirred under nitrogen atmosphere at 125 °C for 1 h. After filtration of the hot brown residue, water (100 mL) was added and the mixture was extracted with ethyl acetate three times (20 mL × 3). The combined organic layer was washed with brine, dried over anhydrous Na<sub>2</sub>SO<sub>4</sub>, filtered and concentrated under reduced pressure. The residue was recrystallization from EtOAc/petroleum ether. The product **2** was obtained as yellow solid in 98% yield. <sup>1</sup>H NMR (400 MHz, CDCl<sub>3</sub>) δ 8.343 (t, *J* = 4.4 Hz, 2H), 7.310 (s, 2H), 7.024 (t, *J* = 3.6 Hz, 2H). <sup>13</sup>C NMR (100 MHz, CDCl<sub>3</sub>) δ 164.8 (d, *J* = 258.0 Hz), 142.9, 136.4, 128.0 (d, *J* = 9.9 Hz), 117.8 (d, *J* = 24.4 Hz), 116.4 (d, *J* = 22.7 Hz). <sup>19</sup>F NMR (376 MHz, CDCl<sub>3</sub>) δ -101.998.

The synthesis of 5,5'-difluoro-[1,1'-biphenyl]-2,2'-diamine (**3**): under nitrogen atmosphere, a solution of 5,5'-difluoro-2,2'-dinitro-1,1'-biphenyl (**2**, 2.52 g, 9 mmol, 1.0 equiv) in 22 mL of ethanol, 4.5 mL of H<sub>2</sub>O and 9 mL of 38% aqueous HCl, then, Stannous chloride dihydrate (12.182 g, 54 mmol, 6.0 equiv) was added in batches. The mixture was stirred and refluxed for 4 h. After cooling to room temperature, NaOH solution (0.002 M) was added until the solution became alkaline. The resulting solution was extracted with ethyl acetate three times. The combined organic layer was washed with brine, dried over anhydrous Na<sub>2</sub>SO<sub>4</sub>, filtered and concentrated under reduced pressure. The residue was purified by column chromatography over silica (eluting with PE : EA = 10 : 1 to 3:1) to give the product **3** as light brown solid in 91%. <sup>1</sup>H NMR (400 MHz, CDCl<sub>3</sub>) δ 6.917 (t, *J* = 7.2 Hz, 2H), 6.847 (t, *J* = 4.4 Hz, 2H), 6.725 (t, *J* = 4.0 Hz, 2H), 3.627 (br, 4H). <sup>13</sup>C NMR (100 MHz, CDCl<sub>3</sub>) δ 156.2 (d, *J* = 235.9 Hz), 140.1, 124.8 (d, *J* = 7.3 Hz), 117.1 (d, *J* = 22.2 Hz), 116.8 (d, *J* = 7.8 Hz), 115.8 (d, *J* = 22.1 Hz). <sup>19</sup>F NMR (376 MHz, CDCl<sub>3</sub>) δ -126.173.

The synthesis of 5,5'-difluoro-2,2'-diiodo-1,1'-biphenyl (**4**): 5,5'-difluoro-[1,1'-biphenyl]-2,2'-diamine (**3**, 1.1 g, 5 mmol, 1.0 equiv) was dissolved in H<sub>2</sub>O (15 mL) and hydrochloric acid (29 mL, 12 M). At -10 °C, a solution of NaNO<sub>2</sub> (1.035 g, 15 mmol, 3.0 equiv) in H<sub>2</sub>O (23 mL) was added dropwise and stirred for 30 min, KI (3.154 g, 19

mmol, 3.8 equiv) in water (33 mL) was added dropwise at  $-15\text{ }^{\circ}\text{C}$ . After stirring for 1 h at this temperature, the resulting mixture was warmed to room temperature and stirred overnight. The reaction was quenched with saturated sodium sulfite solution, and extracted with ethyl acetate three times. The combined organic layer was washed with saturated sodium sulfite solution, brine, dried over anhydrous  $\text{Na}_2\text{SO}_4$ , filtered and concentrated under reduced pressure. The residue was purified by column chromatography over silica with petroleum ether as the eluent. The product **4** was obtained as white solid in 30% yield.  $^1\text{H}$  NMR (400 MHz,  $\text{CDCl}_3$ )  $\delta$  7.877-7.882 (m, 2H), 6.889-6.944 (m, 4H).  $^{13}\text{C}$  NMR (100 MHz,  $\text{CDCl}_3$ )  $\delta$  162.7 (d,  $J = 247.8$  Hz), 149.4 (d,  $J = 7.1$  Hz), 140.4 (d,  $J = 7.9$  Hz), 117.4 (d,  $J = 4.6$  Hz), 117.2 (d,  $J = 5.7$  Hz), 92.2 (d,  $J = 3.3$  Hz).  $^{19}\text{F}$  NMR (376 MHz,  $\text{CDCl}_3$ )  $\delta$  -113.583.

The synthesis of 2,8-difluoro-5-phenylbenzo[*b*]phosphindole 5-oxide (**5**): under nitrogen atmosphere, a solution of 5,5'-difluoro-2,2'-diiodo-1,1'-biphenyl (**4**, 0.442 g, 1 mmol, 1.0 equiv) in dry THF (10 mL) was cooled to  $-78\text{ }^{\circ}\text{C}$ . Then, *n*-BuLi (2.4 mL, 2.4 mmol, 2.4 equiv) was added dropwise and stirred for 1 h at this temperature. After that, dichlorophenylphosphine (0.15 mL, 1.1 mmol, 1.1 equiv) was added dropwise. The reactive mixture was warmed to room temperature and stirred for 1.5 h. Hydrogen peroxide (0.52 mL, 5 mmol, 5.0 equiv) was added slowly under stirring. After being stirred vigorously for 30 min. The reaction was quenched with water, and extracted with ethyl acetate three times. The combined organic layer was washed with brine, dried over anhydrous  $\text{Na}_2\text{SO}_4$ , filtered and concentrated under reduced pressure. The residue was purified by column chromatography over silica (eluting with PE : EA = 2 : 1 to 1:1) to give the product **5** as white solid in 68% yield.  $^1\text{H}$  NMR (400 MHz,  $\text{CDCl}_3$ )  $\delta$  7.699-7.710 (m, 2H), 7.613-7.672 (m, 2H), 7.532 (m, 1H), 7.446 (t,  $J = 9.4$  Hz, 4H), 7.124 (m, 2H).  $^{13}\text{C}$  NMR (100 MHz,  $\text{CDCl}_3$ )  $\delta$  166.5 (d,  $J = 252.7$  Hz), 143.7 (d,  $J = 22.4$  Hz), 132.5 (d,  $J = 2.6$  Hz), 132.1 (d,  $J = 10.1$  Hz), 131.5 (d,  $J = 93.3$  Hz), 130.7 (d,  $J = 51.4$  Hz), 129.6 (d,  $J = 52.1$  Hz), 128.9 (d,  $J = 12.7$  Hz), 117.3 (dd,  $J = 22.4, 12.2$  Hz), 109.2 (dd,  $J = 23.4, 11.1$  Hz).  $^{31}\text{P}$  NMR (162 MHz,  $\text{CDCl}_3$ )  $\delta$  30.823.  $^{19}\text{F}$  NMR (376 MHz,  $\text{CDCl}_3$ )  $\delta$  -104.281.

• **General procedure for the synthesis of PhFIOP-based molecules 7**

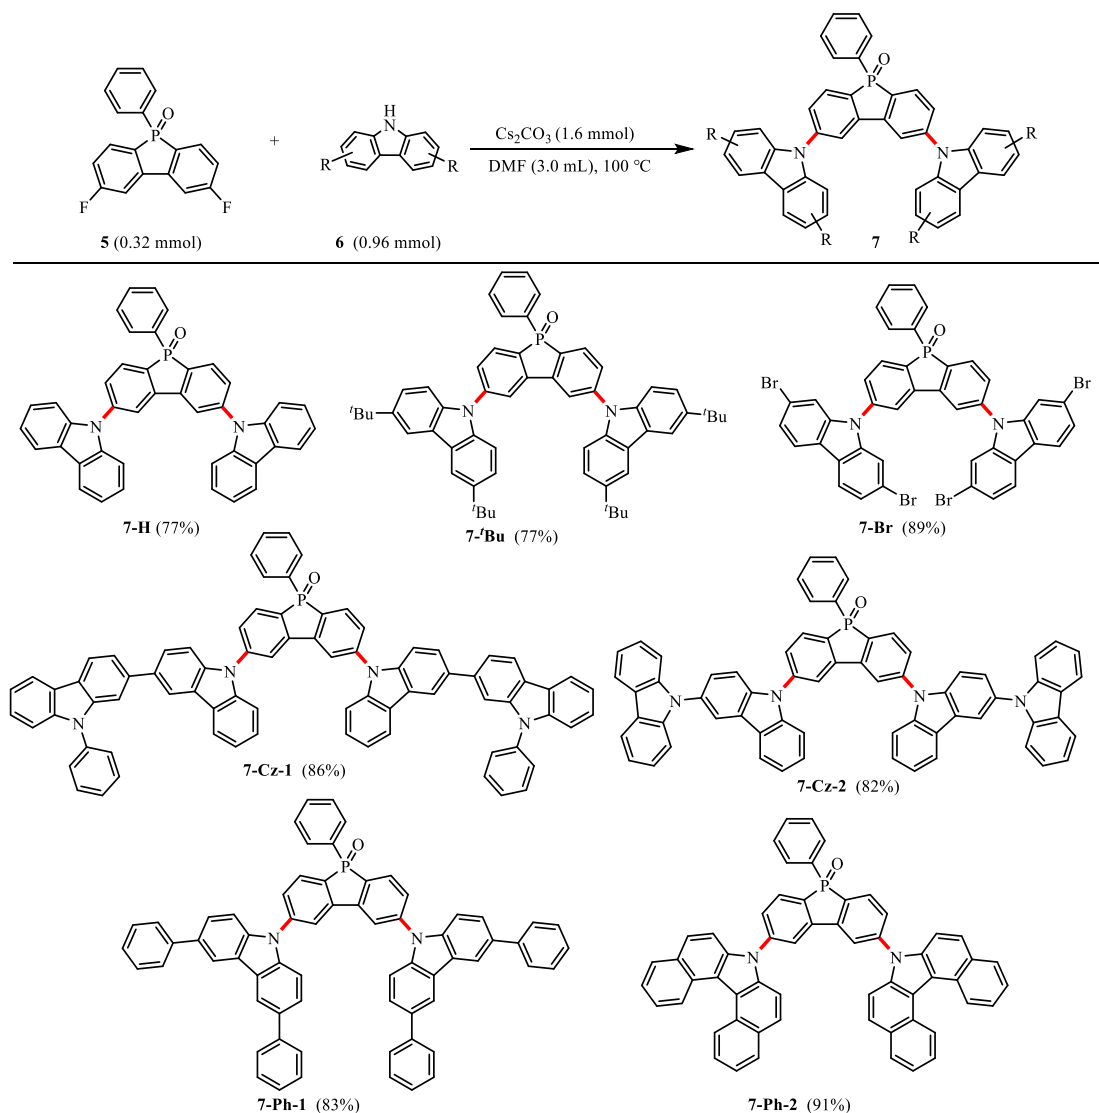

Under nitrogen atmosphere, a solution of carbazole or substituted carbazole **6** (0.96 mmol, 3.0 equiv) and  $\text{Cs}_2\text{CO}_3$  (1.6 mmol, 5.0 equiv) in dry DMF (1.5 mL) was stirred at room temperature for 1 h. Then a solution of 2,8-difluoro-5-phenylbenzo[*b*]phosphindole 5-oxide (**5**, 0.32 mmol, 1.0 equiv) in DMF (1.5 mL) was added. The resulting mixture was stirred at 100 °C for 4 h. TLC or  $^{19}\text{F}$  NMR was used to monitor the reaction. After cooling to room temperature, the reaction was quenched with saturated sodium chloride solution, and extracted with ethyl acetate three times. The combined organic layer was washed with brine, dried over anhydrous  $\text{Na}_2\text{SO}_4$ , filtered and concentrated under reduced pressure. The residue was purified by column chromatography over silica using a proper eluent.

**7-H**: 77% yield.  $^1\text{H}$  NMR (400 MHz,  $\text{CDCl}_3$ )  $\delta$  8.134 (d,  $J = 5.6$  Hz, 4H), 8.037 (s, 4H), 7.891 (m, 2H), 7.712 (s, 2H), 7.638 (s, 1H), 7.562 (s, 2H), 7.490 (s, 4H), 7.420 (s, 4H).  $^{13}\text{C}$  NMR (100 MHz,  $\text{CDCl}_3$ )  $\delta$  143.3 (d,  $J = 21.8$  Hz), 143.1, 140.1, 132.8, 132.3, 131.8 (d,  $J = 10.2$  Hz), 131.4, 131.3, 129.2 (d,  $J = 12.5$  Hz), 128.1 (d,  $J = 11.3$  Hz), 126.4,

123.9, 120.7 (d,  $J = 20.5$  Hz), 119.6 (d,  $J = 10.0$  Hz), 109.7.  $^{31}\text{P}$  NMR (162 MHz,  $\text{CDCl}_3$ )  $\delta$  32.2. HRMS calculated for  $\text{C}_{42}\text{H}_{28}\text{N}_2\text{OP}$  ( $\text{M} + \text{H}^+$ ): 607.1934, found 607.1935.

**7-*t*-Bu**: 77% yield.  $^1\text{H}$  NMR ( $\text{CDCl}_3$ , 400 MHz):  $\delta$  8.129-8.121 (d,  $J = 3$  Hz, 4H), 8.016-7.989 (d,  $J = 11$  Hz, 4H), 7.904-7.859 (m, 2H), 7.699 (s, 2H), 7.633-7.624 (d,  $J = 4$  Hz, 1H), 7.552 (s, 2H), 7.458 (s, 8H), 1.450-1.444 (d,  $J = 2$  Hz, 36H).  $^{13}\text{C}$  NMR (100 MHz,  $\text{CDCl}_3$ )  $\delta$  143.8, 143.6, 138.4, 132.7, 131.7, 131.6, 131.3, 129.1 (d,  $J = 12.5$  Hz), 127.4 (d,  $J = 11.5$  Hz), 124.1, 123.9, 119.0 (d,  $J = 9.9$  Hz), 116.5, 109.2, 34.8, 32.0.  $^{31}\text{P}$  NMR (162 MHz,  $\text{CDCl}_3$ )  $\delta$  32.36. HRMS calculated for  $\text{C}_{58}\text{H}_{60}\text{N}_2\text{OP}$  ( $\text{M} + \text{H}^+$ ): 831.4438, found 831.4437.

**7-Br**: 89% yield.  $^1\text{H}$  NMR ( $\text{CDCl}_3$ , 400 MHz):  $\delta$  8.073-8.048 (d,  $J = 10$  Hz, 2H), 7.962-7.885 (m, 7H), 7.671-7.561 (m, 8H), 7.447-7.414 (m, 3H), 7.274-7.258 (m, 3H).  $^{13}\text{C}$  NMR (100 MHz,  $\text{CDCl}_3$ )  $\delta$  143.23, 141.84, 141.22, 133.66, 133.09, 132.61, 132.17, 131.41, 129.36, 128.68, 124.46, 122.15, 121.76, 120.38, 120.06, 112.95.  $^{31}\text{P}$  NMR (162 MHz,  $\text{CDCl}_3$ )  $\delta$  31.80. HRMS calculated for  $\text{C}_{42}\text{H}_{24}\text{Br}_4\text{N}_2\text{OP}$  ( $\text{M} + \text{H}^+$ ): 918.8354, found 918.8356.

**7-Cz-1**: 86% yield.  $^1\text{H}$  NMR ( $\text{CDCl}_3$ , 400 MHz):  $\delta$  8.430 (s, 4H), 8.236-8.190 (m, 4H), 8.125 (s, 2H), 8.042 (s, 2H), 7.923 (s, 2H), 7.788-7.718 (m, 6H), 7.620-7.538 (m, 16H), 7.497-7.419 (m, 10H), 7.344-7.281 (m, 3H).  $^{13}\text{C}$  NMR (100 MHz,  $\text{CDCl}_3$ )  $\delta$  143.52, 143.30, 143.23, 141.33, 140.60, 140.09, 139.24, 137.70, 135.29, 133.96, 132.89, 132.25, 131.93, 131.43, 129.98, 129.27, 128.13, 127.52, 127.08, 126.57, 126.29, 126.16, 125.80, 124.58, 124.17, 123.99, 123.52, 120.96, 120.78, 120.48, 120.08, 119.64, 119.18, 118.97, 110.11, 110.03, 109.96, 109.86.  $^{31}\text{P}$  NMR (162 MHz,  $\text{CDCl}_3$ )  $\delta$  32.33. HRMS calculated for  $\text{C}_{78}\text{H}_{50}\text{N}_4\text{OP}$  ( $\text{M} + \text{H}^+$ ): 1089.3717, found 1089.3715.

**7-Cz-2**: 82% yield.  $^1\text{H}$  NMR ( $\text{CDCl}_3$ , 400 MHz):  $\delta$  8.294-8.285 (d,  $J = 4$  Hz, 2H), 8.188-8.168 (d,  $J = 8$  Hz, 6H), 8.128-8.103 (4H), 7.929 (s, 2H), 7.818-7.798 (d,  $J = 8$  Hz, 2H), 7.712-7.679 (m, 3H), 7.585-7.561 (d,  $J = 10$  Hz, 6H), 7.521-7.495 (m, 2H), 7.384-7.345 (m, 10H), 7.330-7.283 (m, 4H).  $^{13}\text{C}$  NMR (100 MHz,  $\text{CDCl}_3$ )  $\delta$  143.53, 142.85, 141.71, 140.90, 139.27, 133.00, 132.13, 131.39, 130.73, 129.30, 128.51, 127.15, 125.94, 124.99, 123.44, 123.16, 121.28, 120.94, 120.37, 119.91, 119.76, 110.79, 110.01, 109.72.  $^{31}\text{P}$  NMR (162 MHz,  $\text{CDCl}_3$ )  $\delta$  32.25. HRMS calculated for  $\text{C}_{66}\text{H}_{41}\text{N}_4\text{OPNa}$  ( $\text{M} + \text{Na}^+$ ): 959.2910, found 959.2909.

**7-Ph-1**: 83% yield.  $^1\text{H}$  NMR ( $\text{CDCl}_3$ , 400 MHz):  $\delta$  8.415-8.375 (m, 4H), 8.121 (s, 1H), 8.081-8.014 (m, 2H), 7.945-7.890 (m, 2H), 7.747-7.638 (m, 15H), 7.593-7.566 (m, 5H), 7.514-7.440 (m, 10H), 7.388-7.318 (m, 4H).  $^{31}\text{P}$  NMR (162 MHz,  $\text{CDCl}_3$ )  $\delta$  32.64. HRMS calculated for  $\text{C}_{66}\text{H}_{44}\text{N}_2\text{OP}$  ( $\text{M} + \text{H}^+$ ): 911.3186, found 911.3175.

**7-Ph-2**: 91% yield.  $^1\text{H}$  NMR ( $\text{CDCl}_3$ , 400 MHz):  $\delta$  9.202-9.173 (m, 4H), 8.115 (s, 2H), 8.063 (s, 3H), 8.017-7.953 (m, 7H), 7.849-7.831 (d,  $J = 7$  Hz, 3H), 7.760-7.684 (m, 8H), 7.634-7.608 (m, 4H), 7.546-7.499 (m, 4H). HRMS calculated for  $\text{C}_{58}\text{H}_{35}\text{N}_2\text{OPNa}$  ( $\text{M} + \text{Na}^+$ ): 829.2379, found 829.2384.

•  $^1\text{H}$ ,  $^{13}\text{C}$ ,  $^{19}\text{F}$  and  $^{31}\text{P}$  NMR spectra

Figure S1  $^1\text{H}$ ,  $^{13}\text{C}$  and  $^{19}\text{F}$ -NMR Compound 2

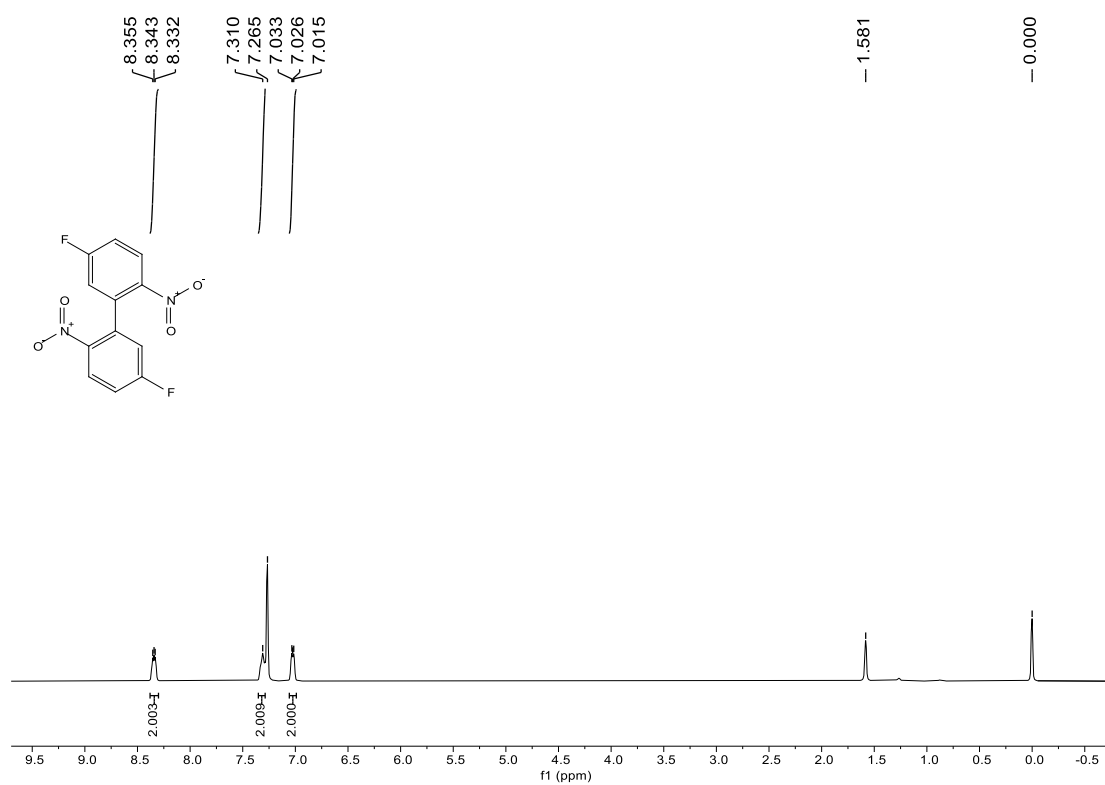

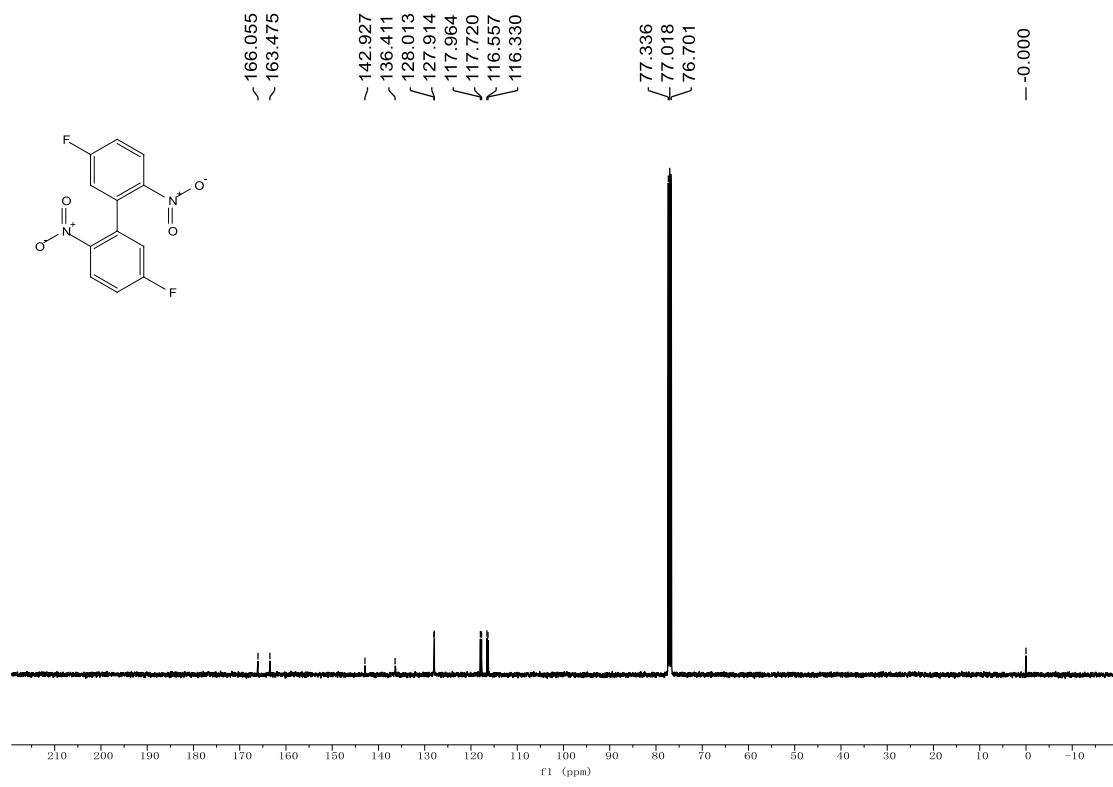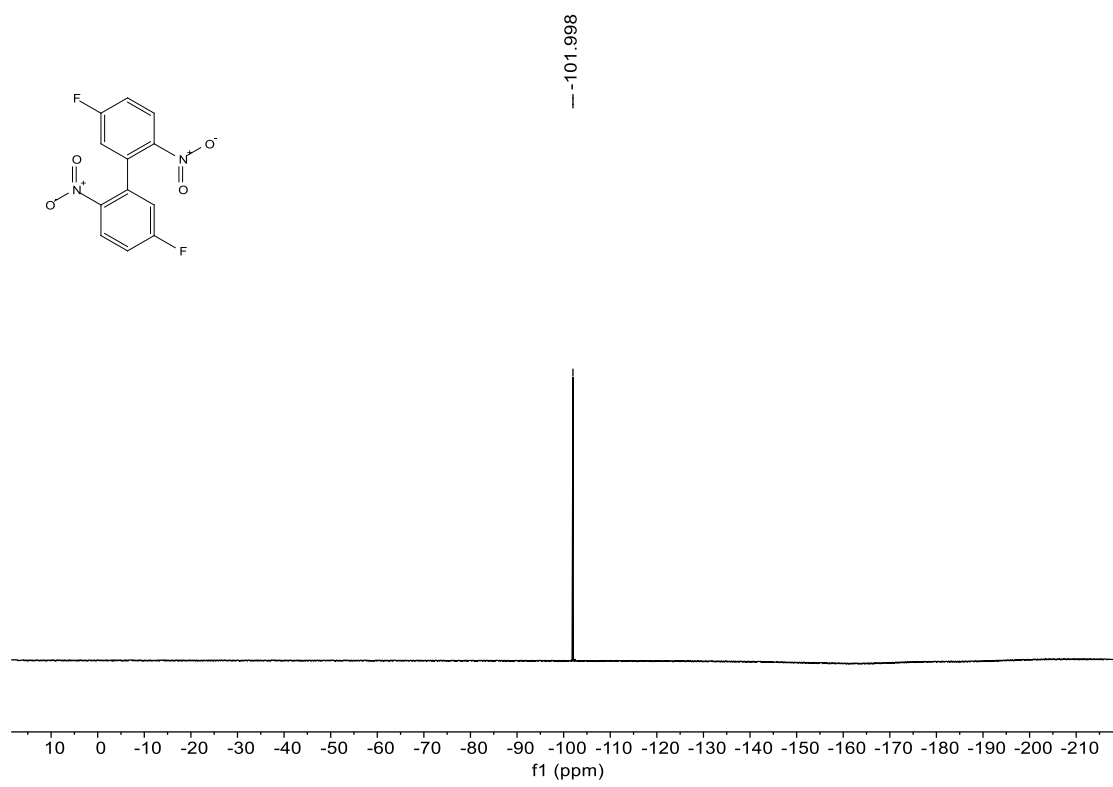



Figure S2 <sup>1</sup>H, <sup>13</sup>C and <sup>19</sup>F-NMR Compound 3

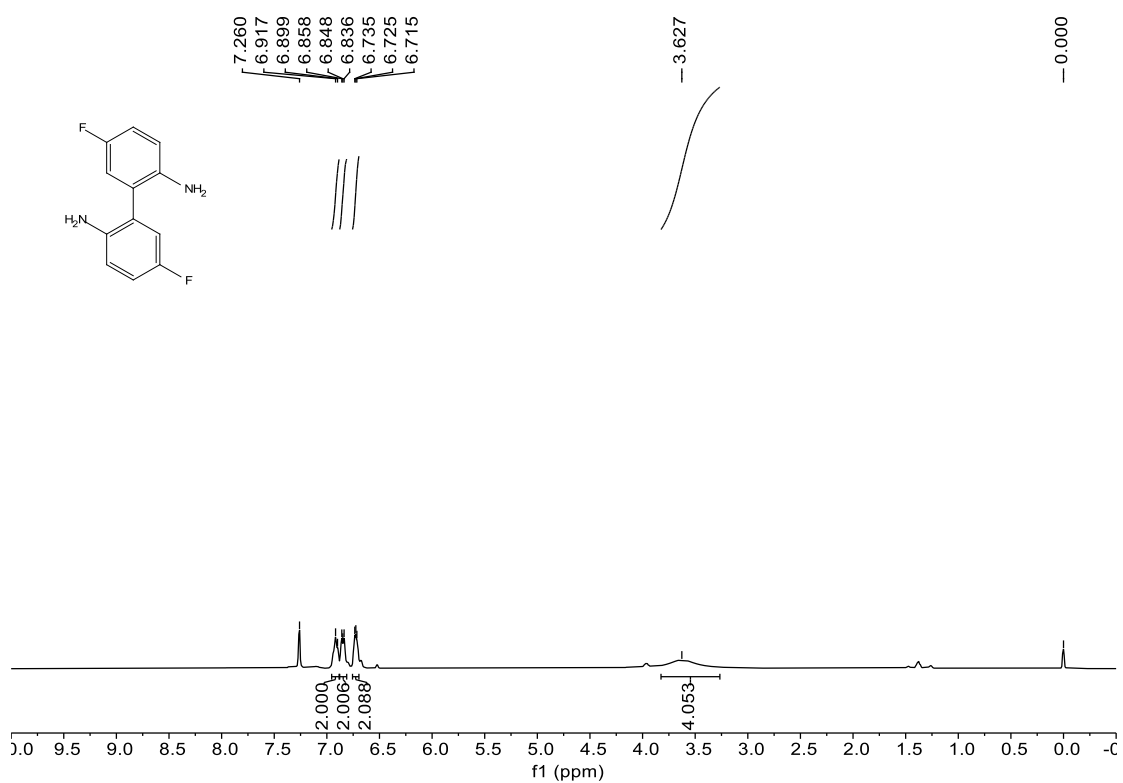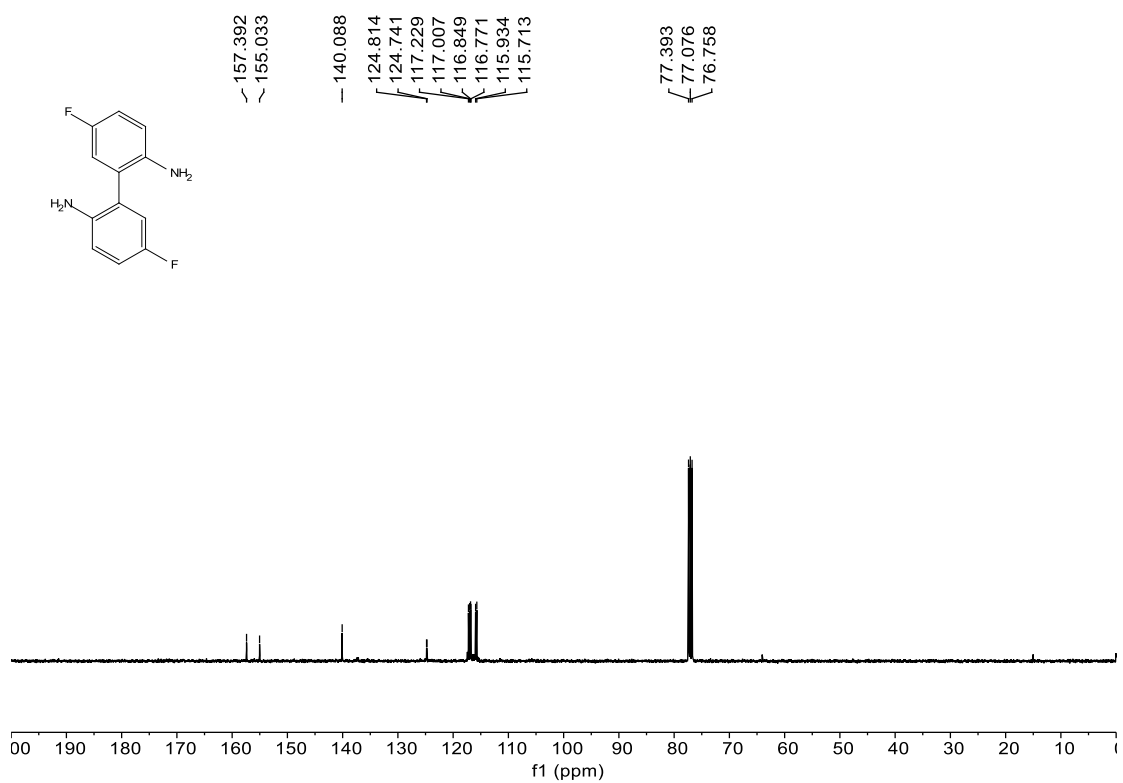

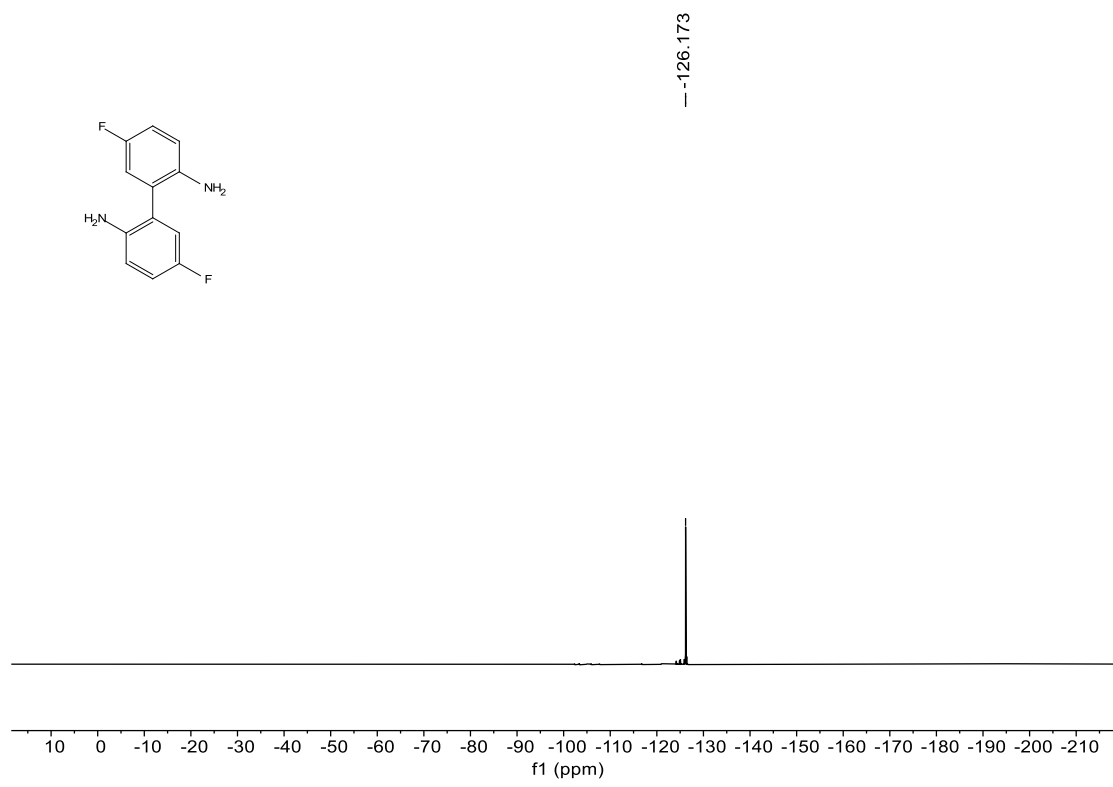

Figure S3  $^1\text{H}$ ,  $^{13}\text{C}$  and  $^{19}\text{F}$ -NMR Compound 4

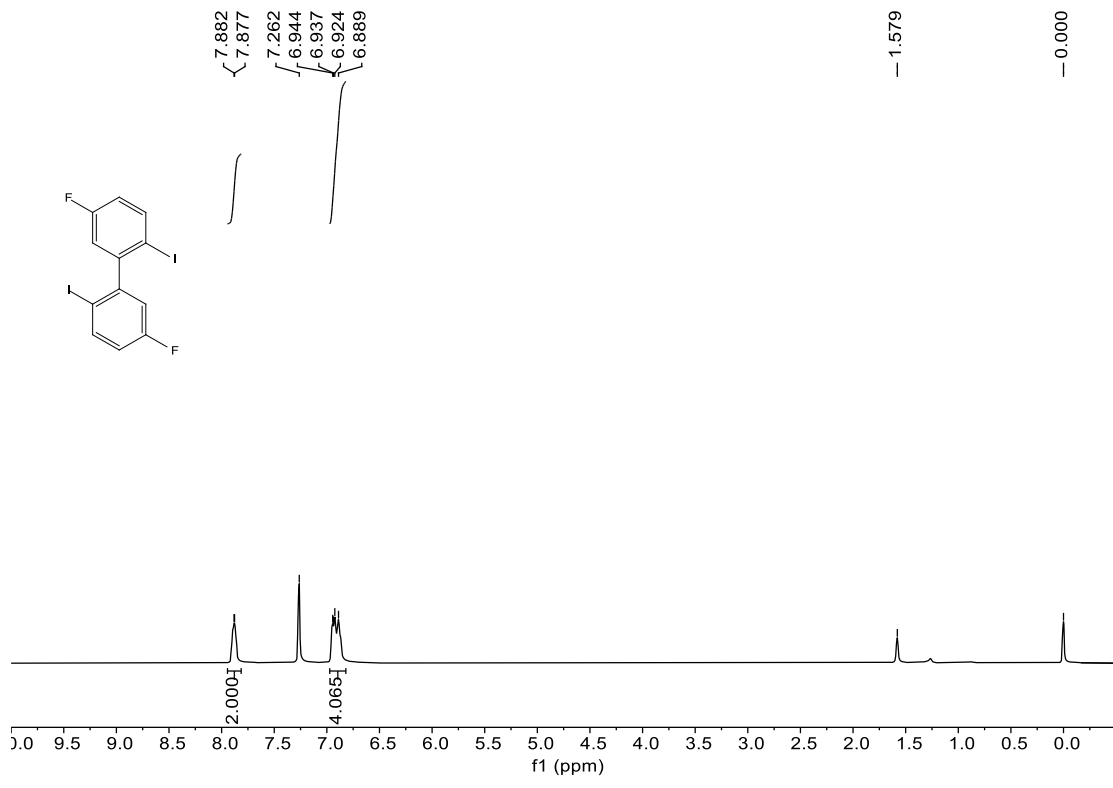

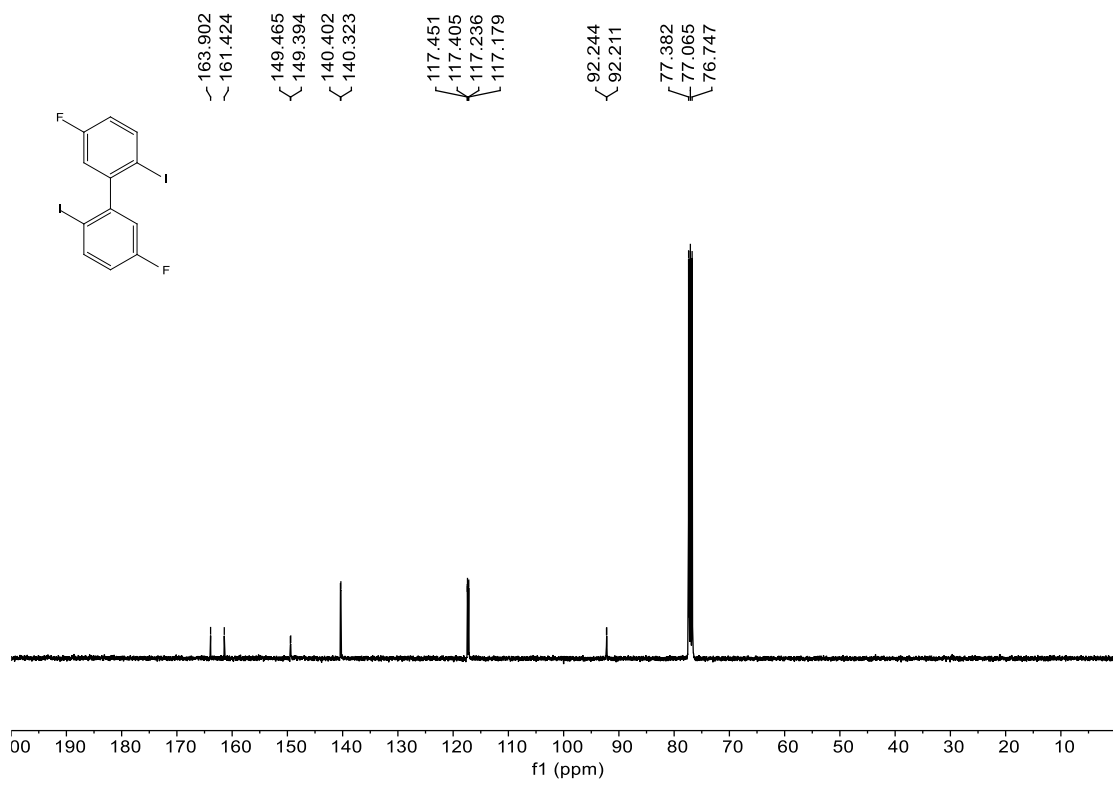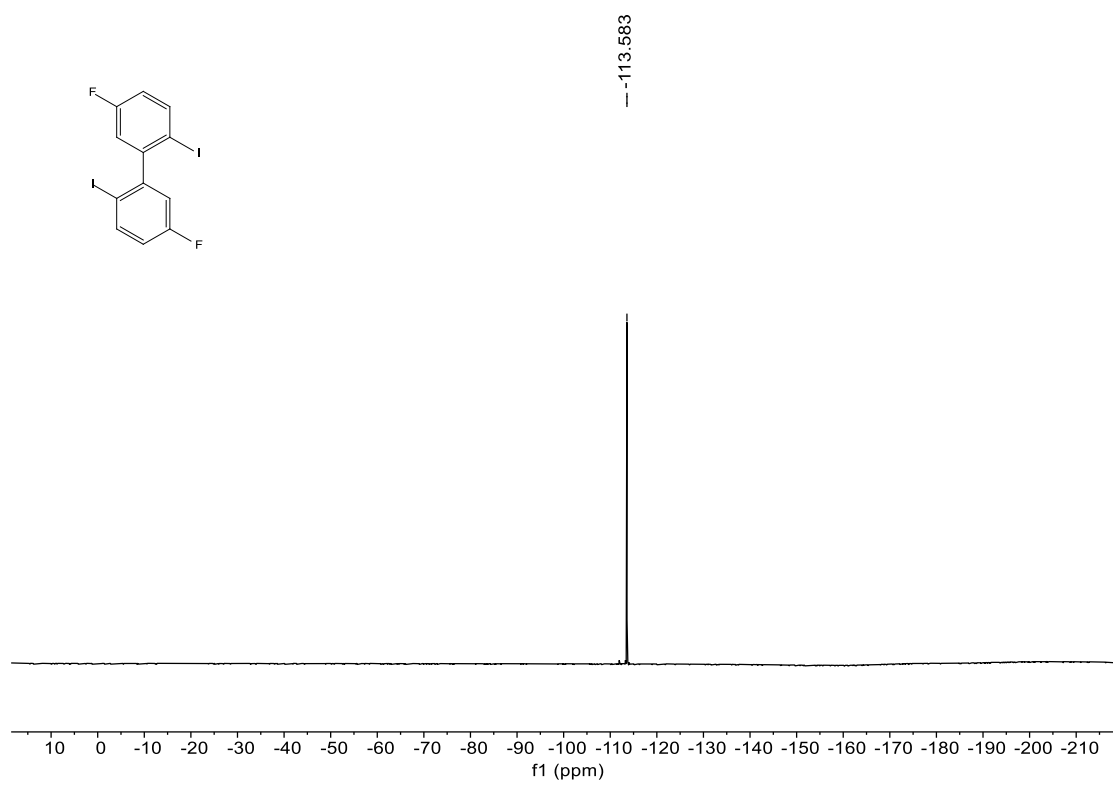

Figure S4  $^1\text{H}$ ,  $^{13}\text{C}$ ,  $^{19}\text{F}$  and  $^{31}\text{P}$ -NMR Compound 5

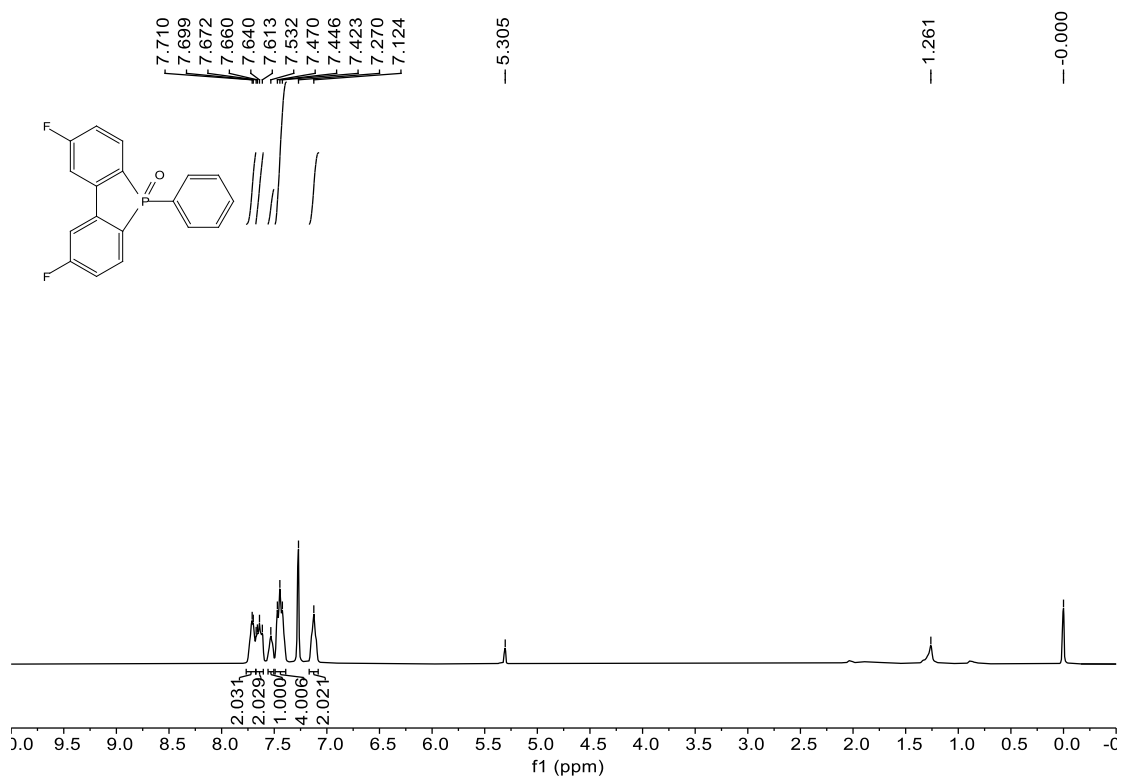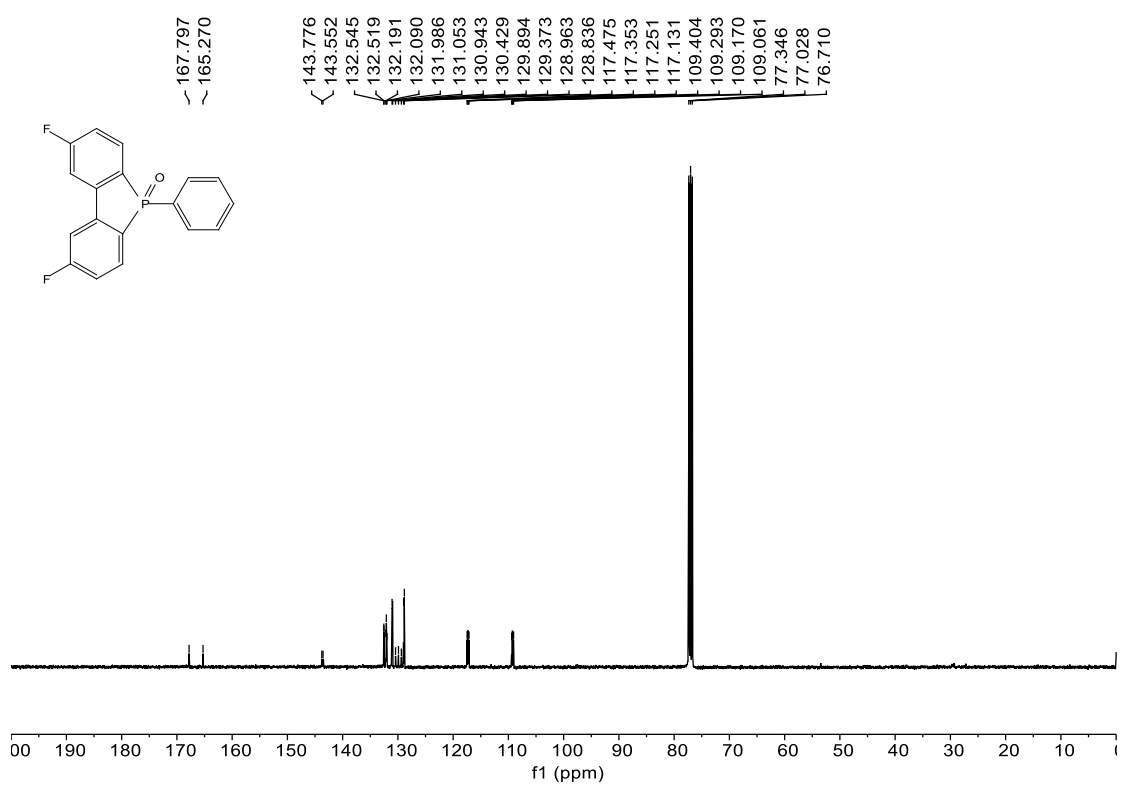

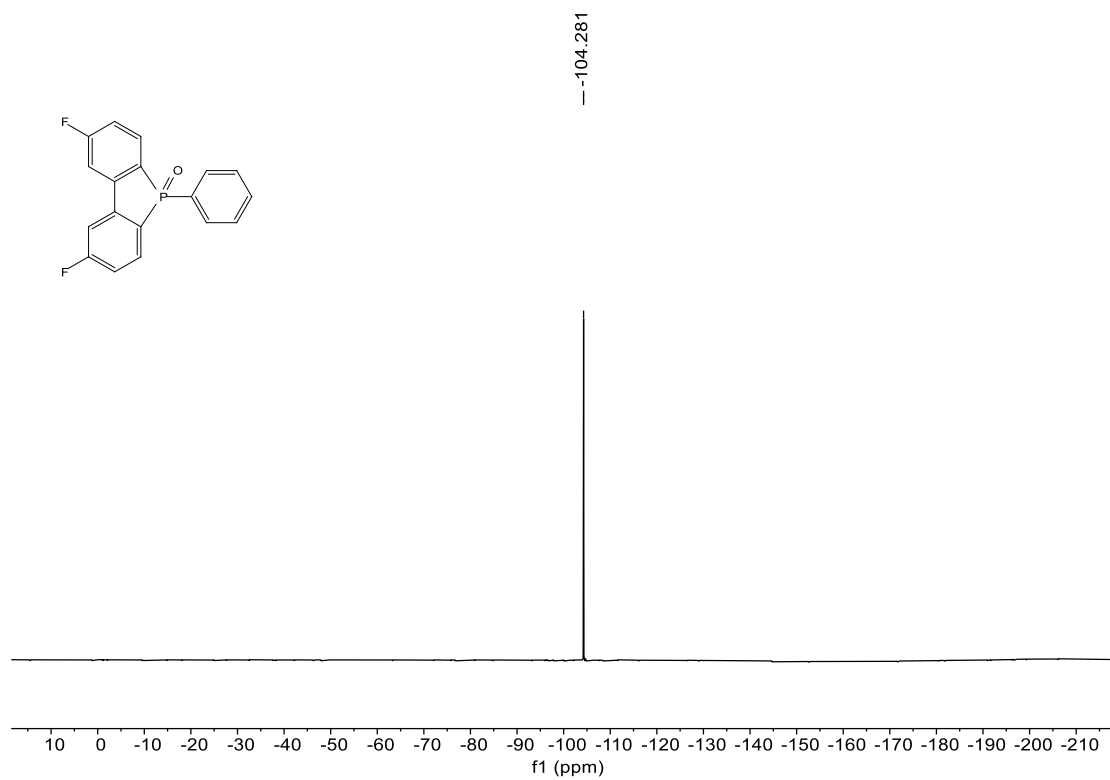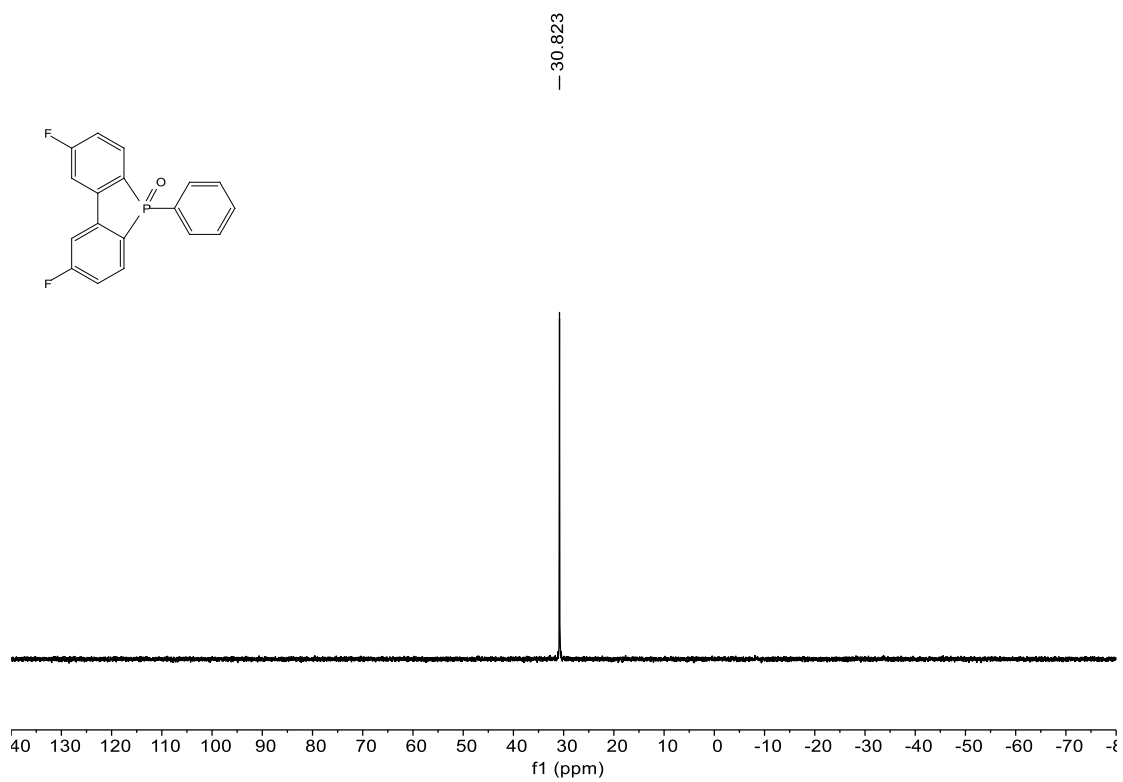

Figure S5  $^1\text{H}$ ,  $^{13}\text{C}$  and  $^{31}\text{P}$ -NMR Compound 7-H

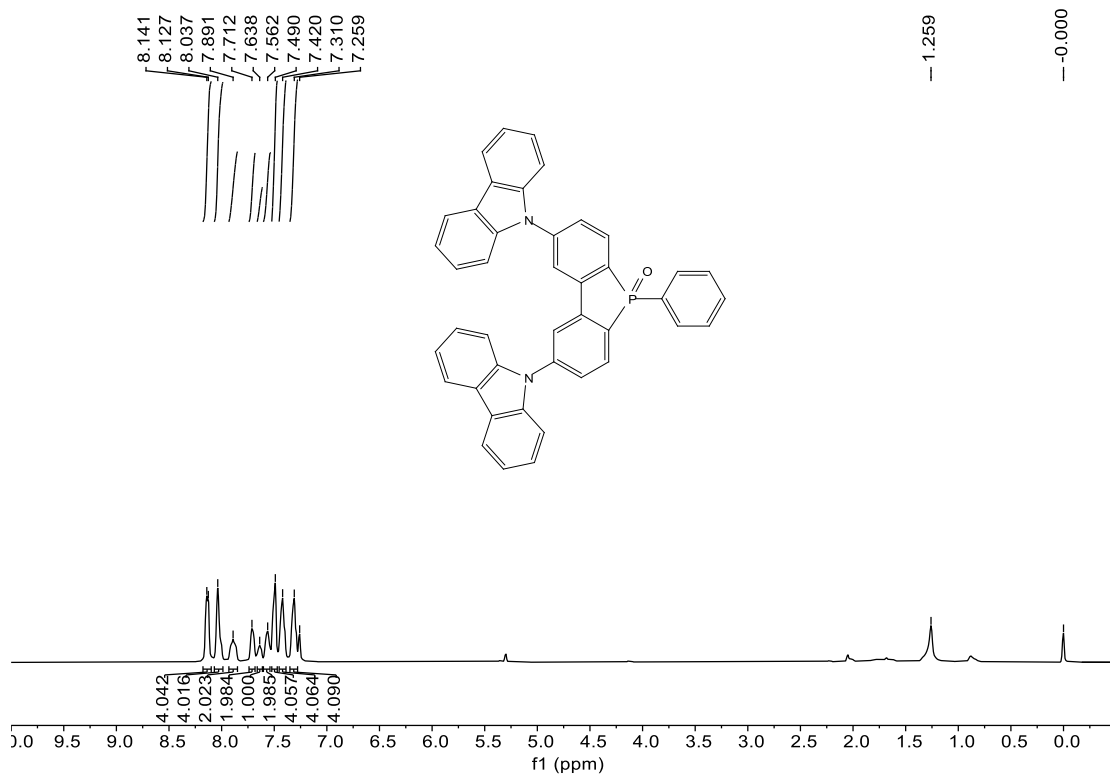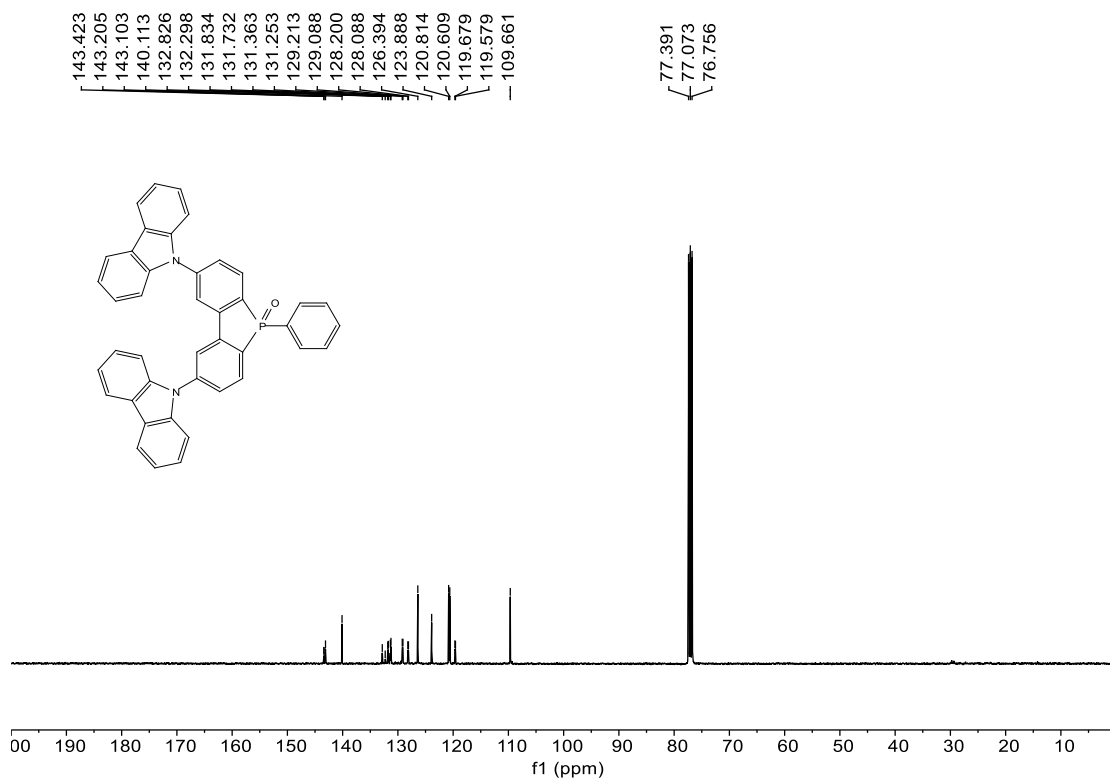

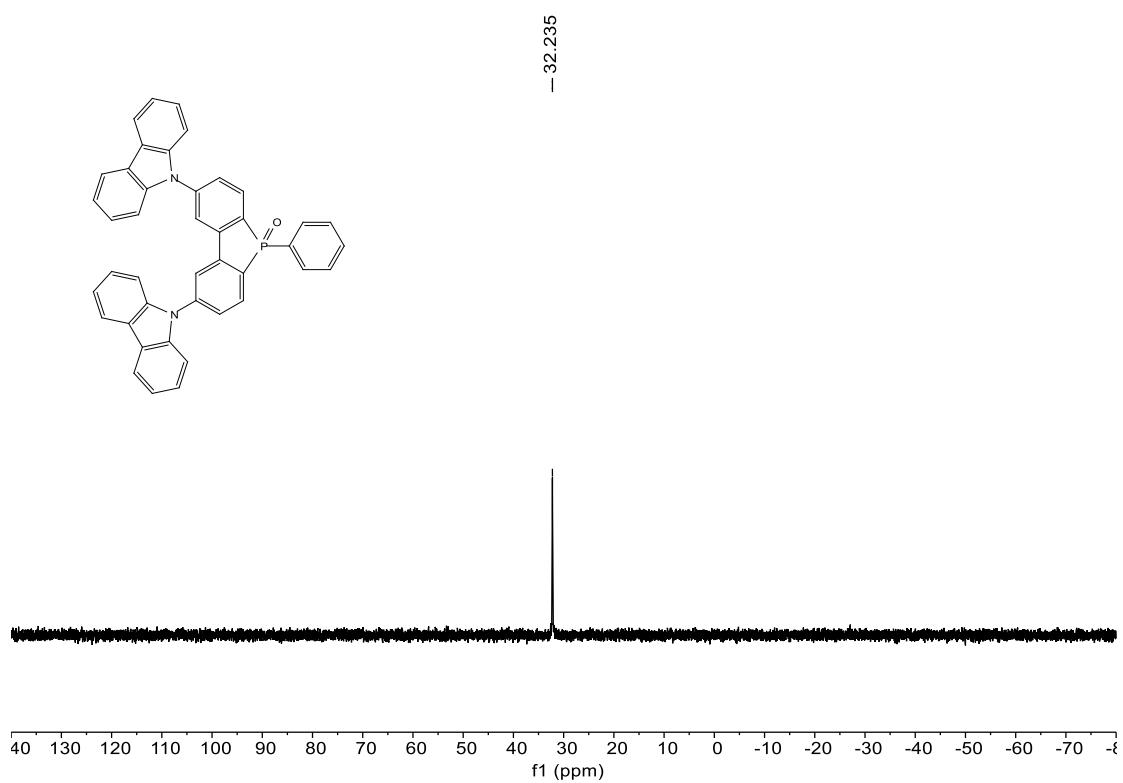

Figure S6  $^1\text{H}$ ,  $^{13}\text{C}$  and  $^{31}\text{P}$ -NMR Compound 7-tBu

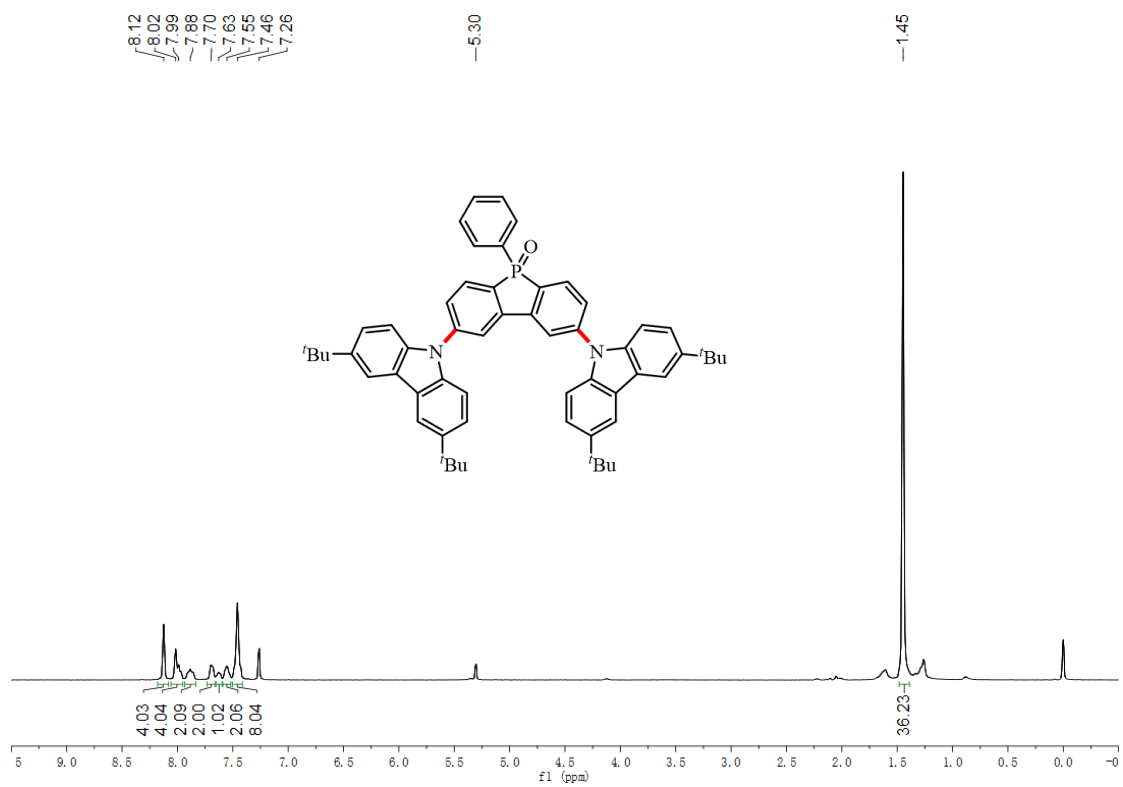

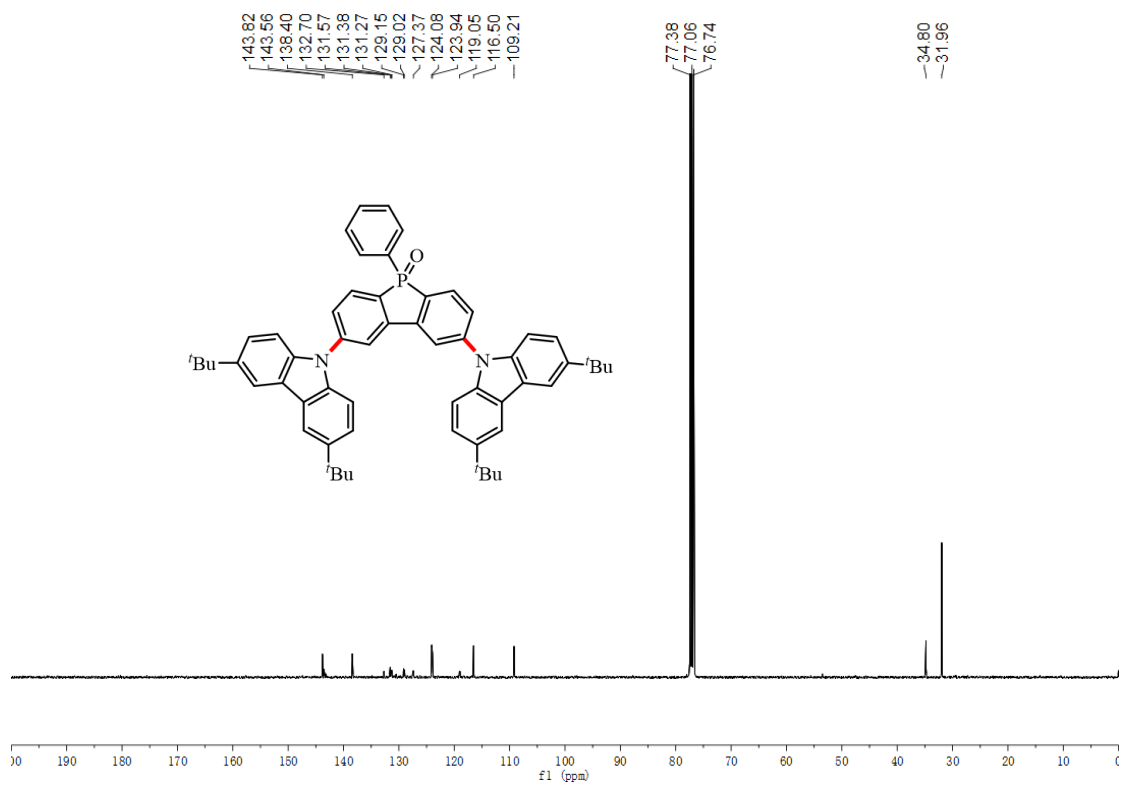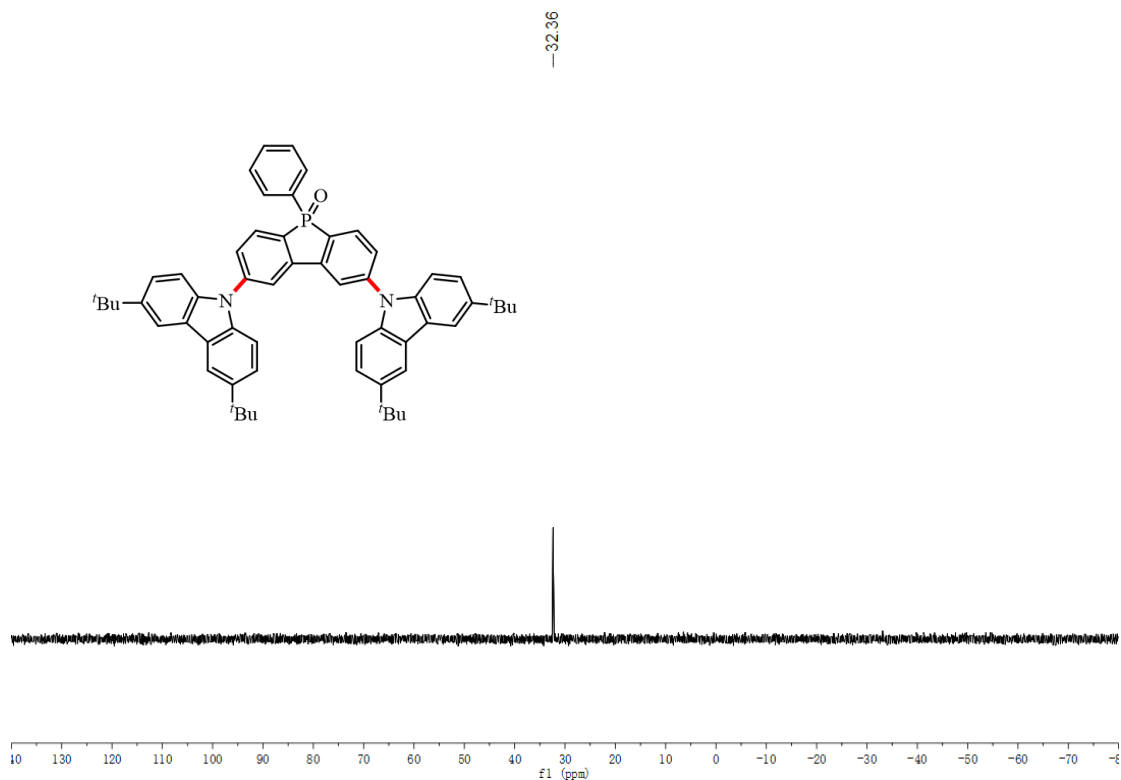



Figure S7  $^1\text{H}$ ,  $^{13}\text{C}$  and  $^{31}\text{P}$ -NMR Compound 7-Br

8.073  
8.048  
7.962  
7.947  
7.934  
7.927  
7.914  
7.900  
7.885  
7.671  
7.659  
7.638  
7.609  
7.600  
7.575  
7.567  
7.561  
7.447  
7.434  
7.421  
7.414  
7.274  
7.265  
7.258

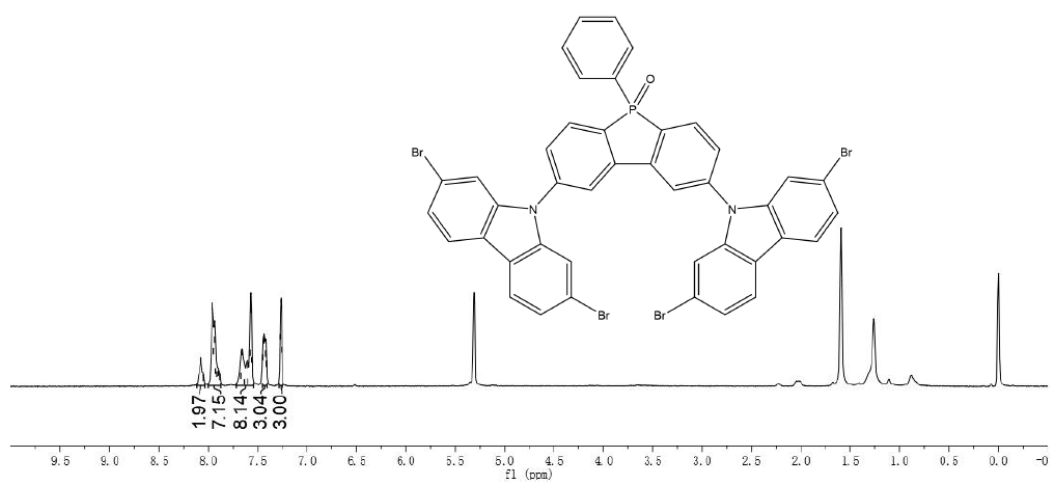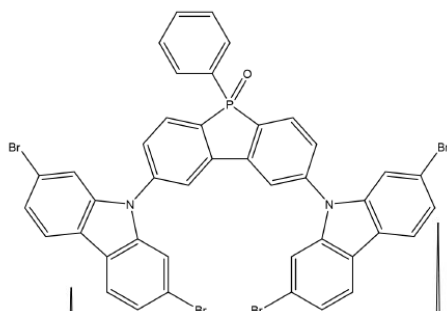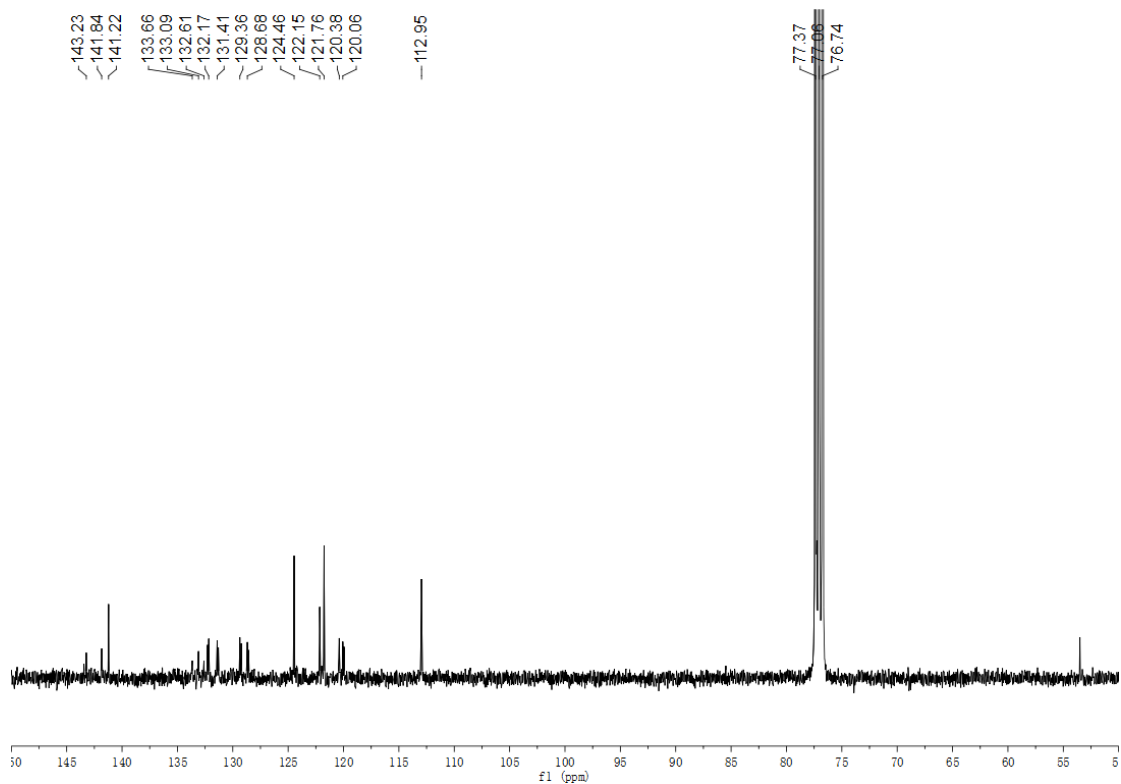

143.23  
141.84  
141.22  
133.66  
133.09  
132.61  
132.17  
131.41  
129.36  
128.68  
124.46  
122.15  
121.76  
120.38  
120.06  
112.95

77.37  
77.06  
76.74

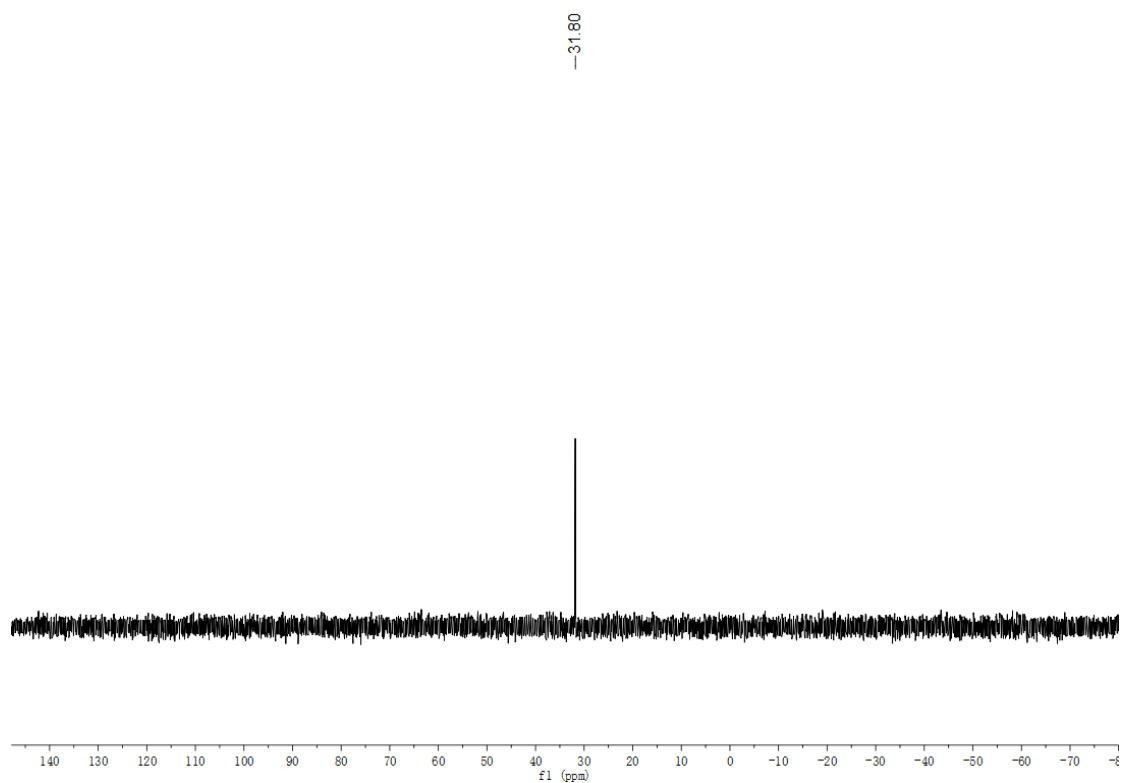

**Figure S8  $^1\text{H}$ ,  $^{13}\text{C}$  and  $^{31}\text{P}$ -NMR Compound 7-Cz-1**

8.430  
8.236  
8.213  
8.190  
8.125  
8.042  
7.923  
7.788  
7.764  
7.738  
7.718  
7.650  
7.620  
7.609  
7.592  
7.582  
7.560  
7.538  
7.487  
7.486  
7.470  
7.463  
7.443  
7.419  
7.400  
7.344  
7.330  
7.310  
7.295  
7.281

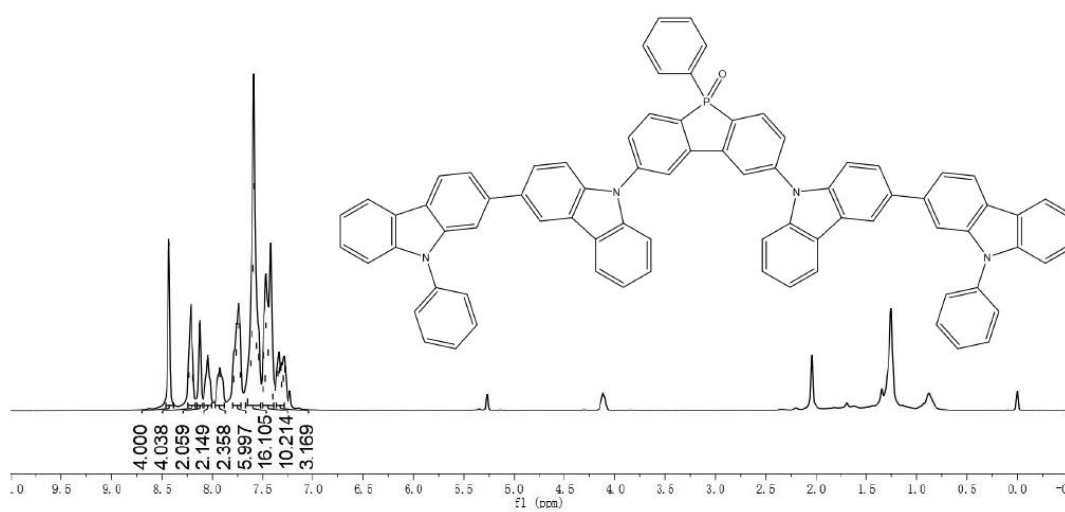

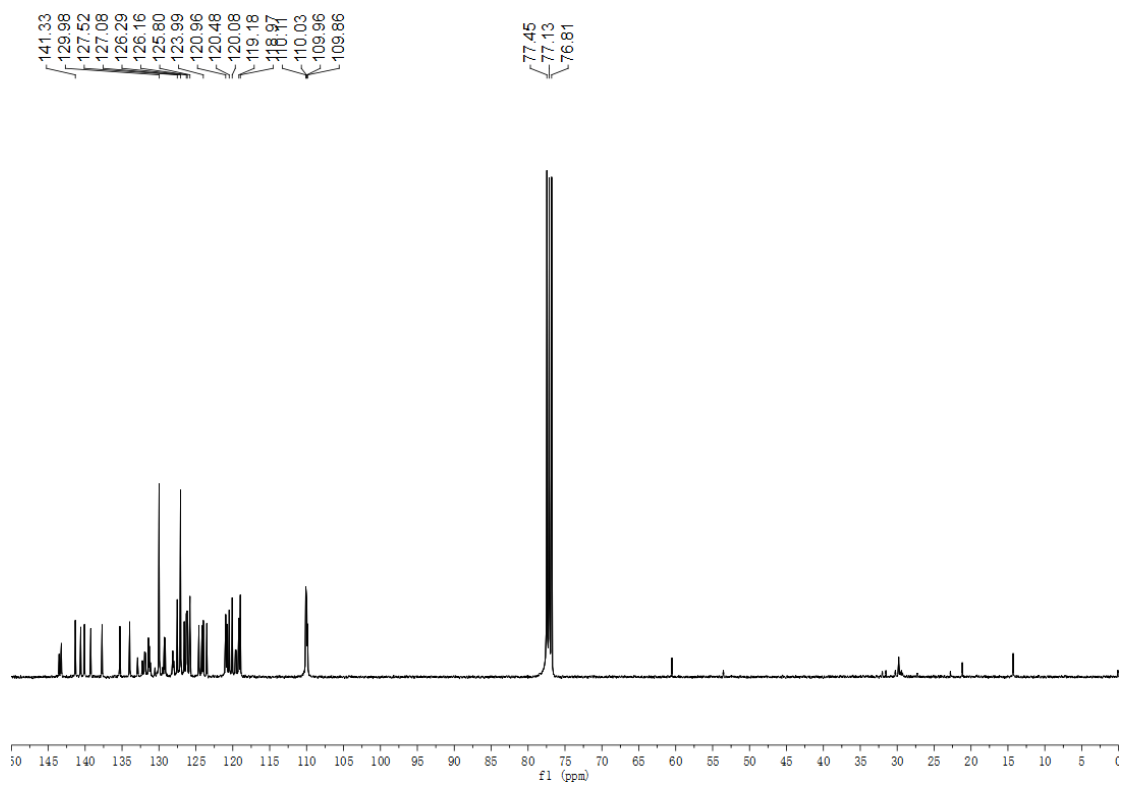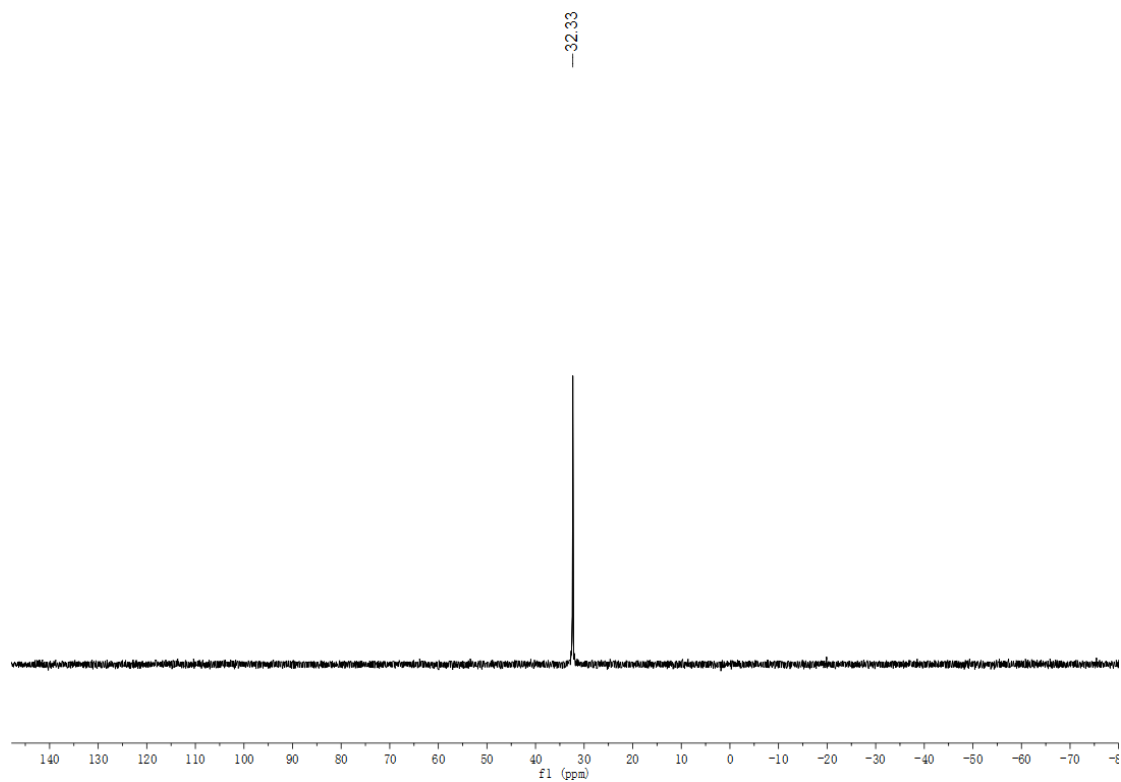

Figure S9  $^1\text{H}$ ,  $^{13}\text{C}$  and  $^{31}\text{P}$ -NMR Compound 7-Cz-2

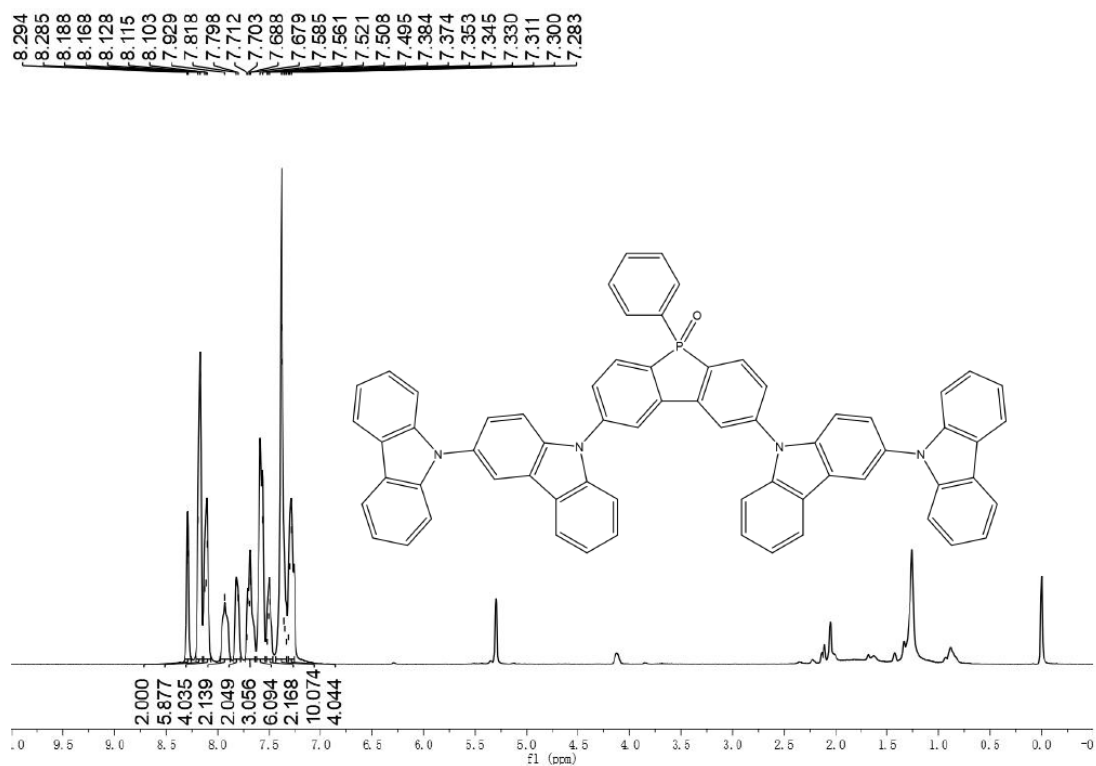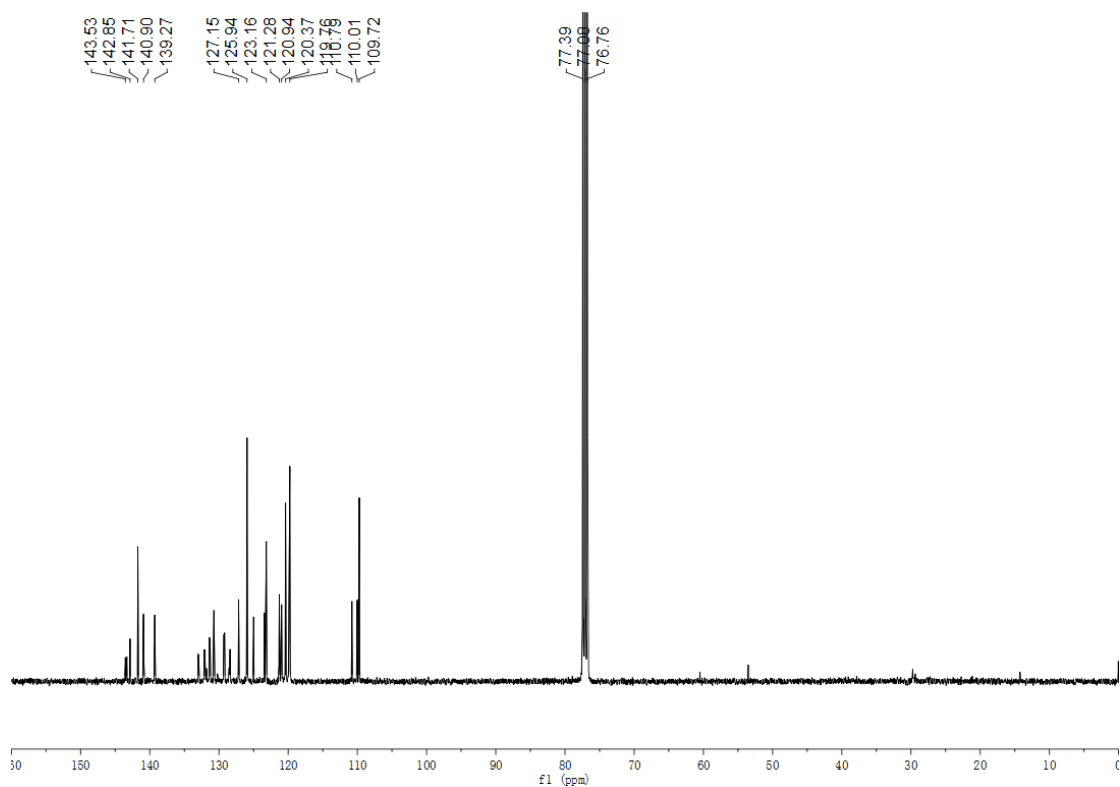

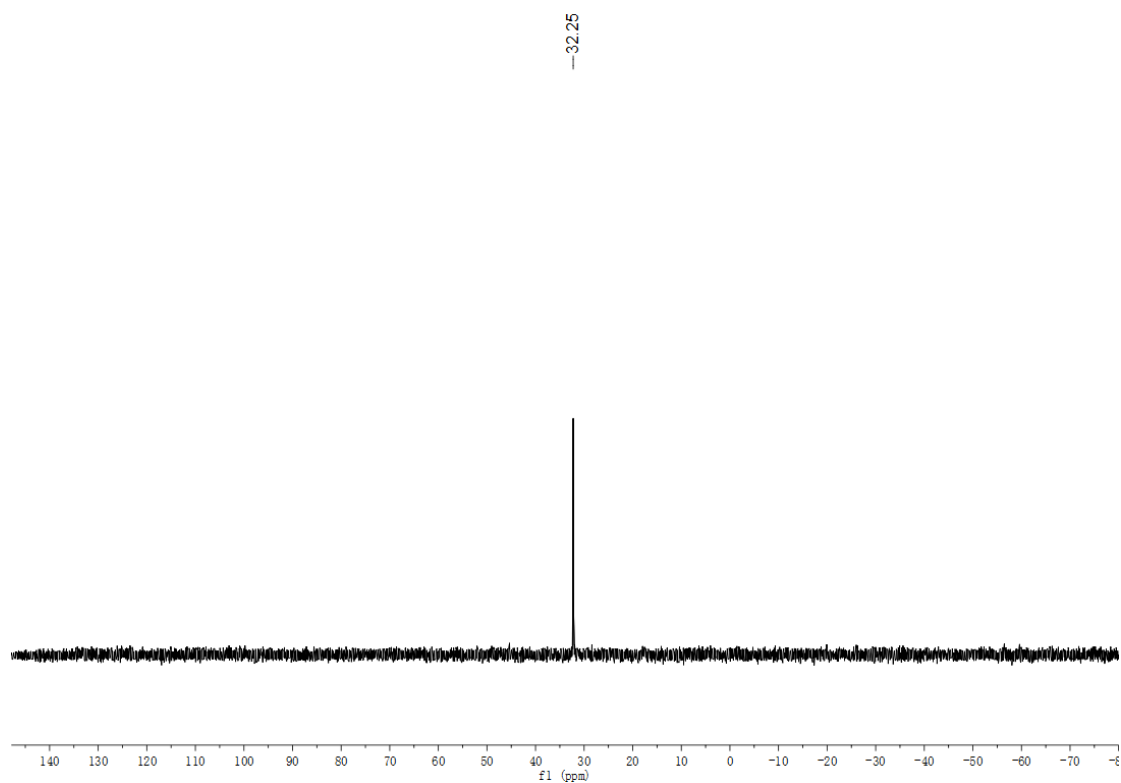

**Figure S10 <sup>1</sup>H and <sup>31</sup>P-NMR Compound 7-Ph-1**

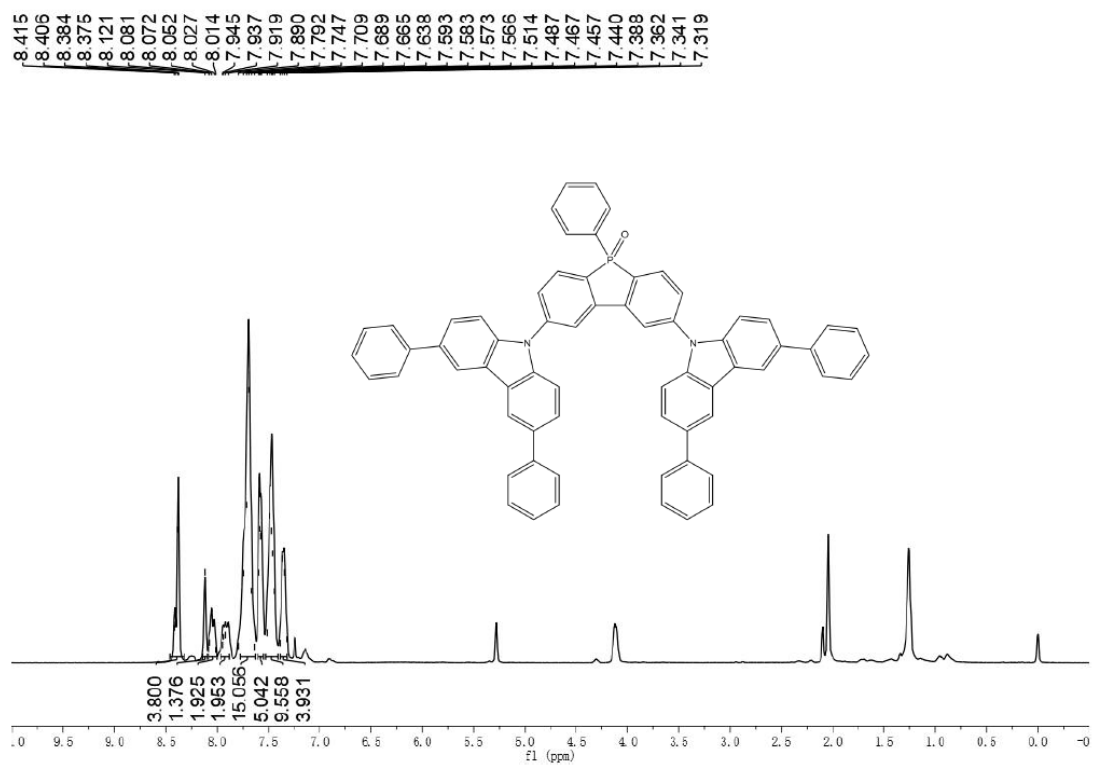

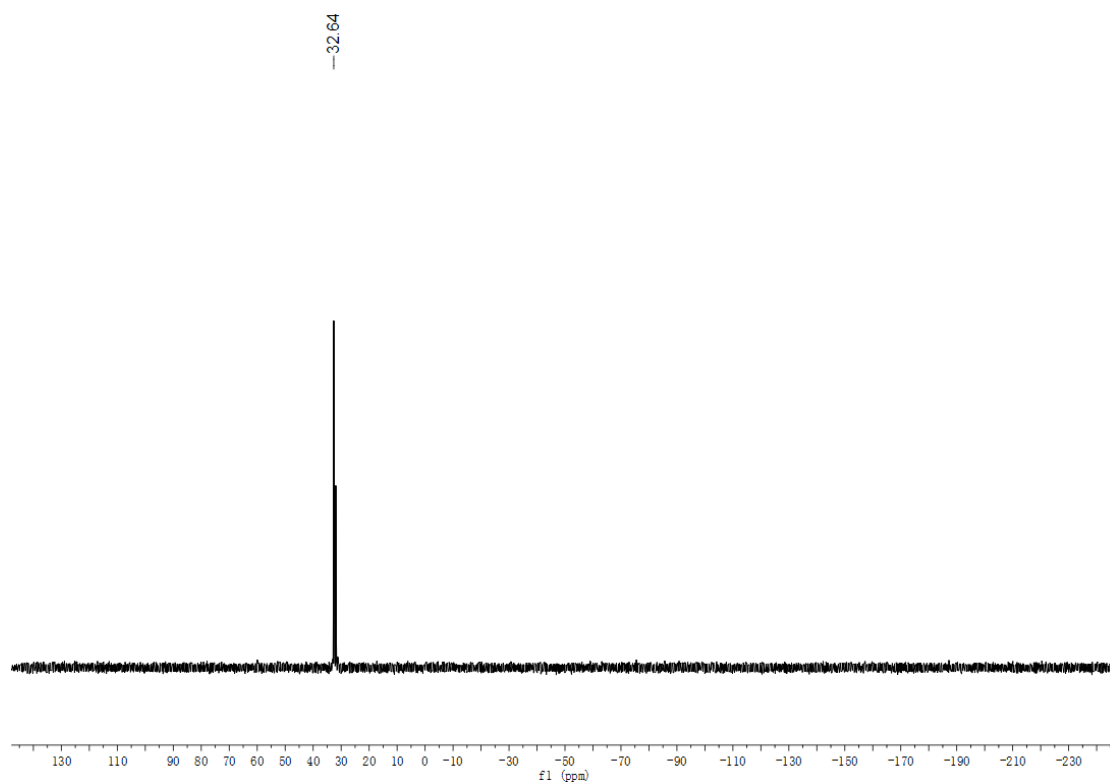

Figure S11 <sup>1</sup>H-NMR Compound 7-Ph-2

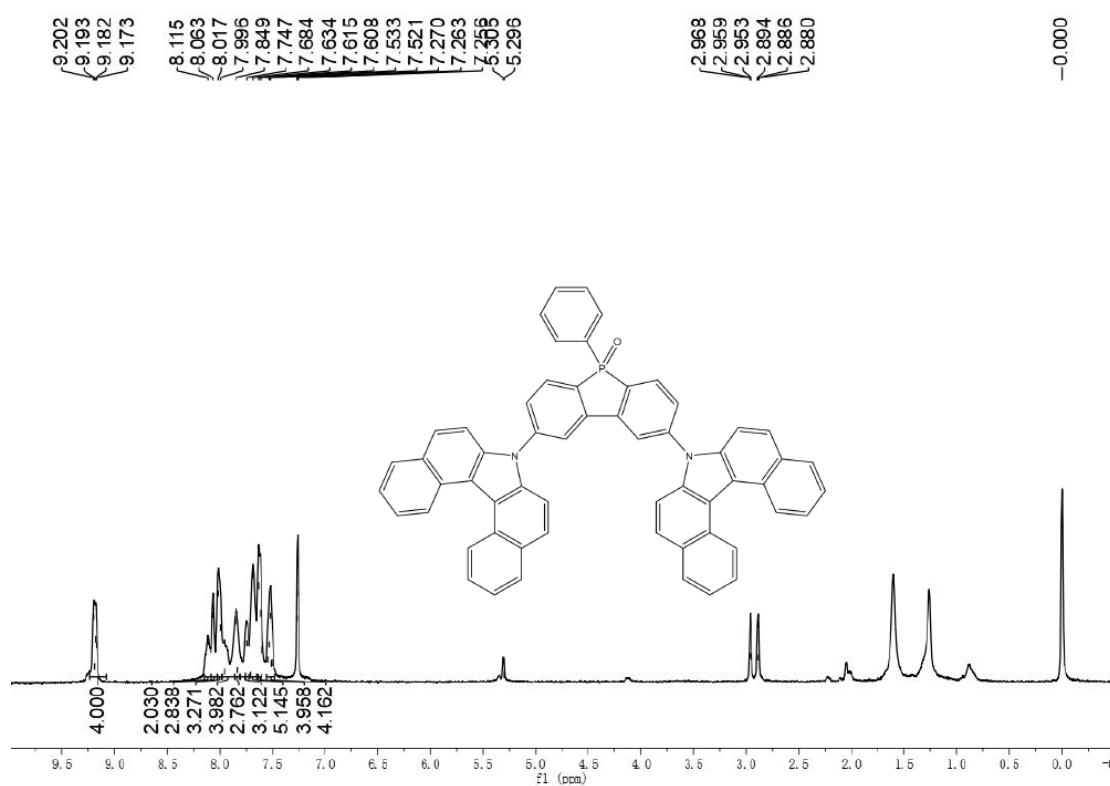

- **IR spectra**

**Figure S12 7-H**

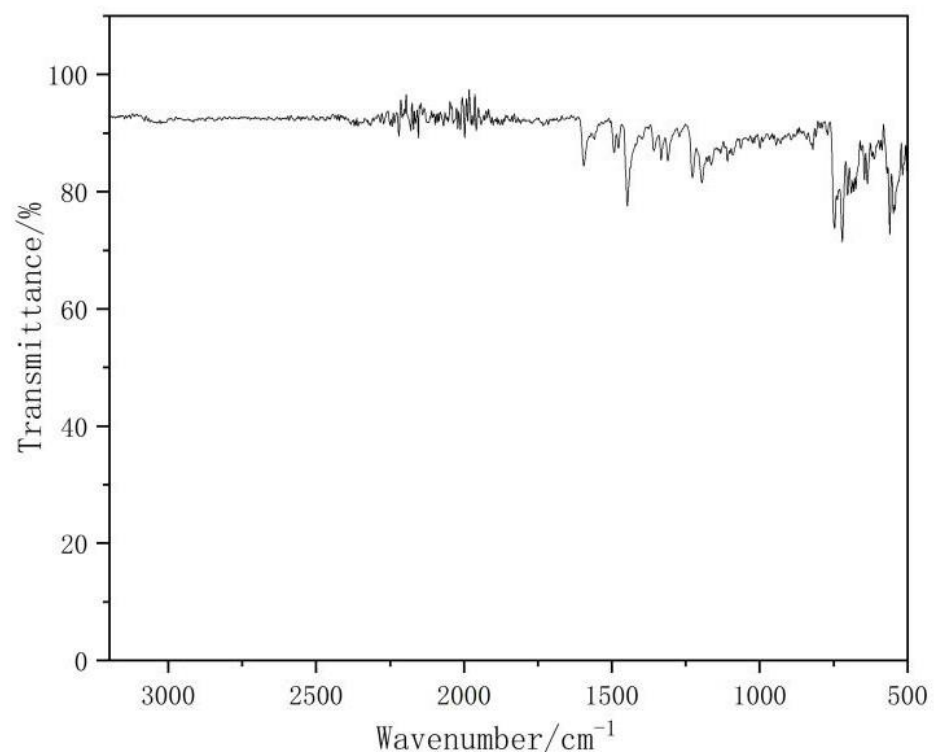

**Figure S13 7-Bu**

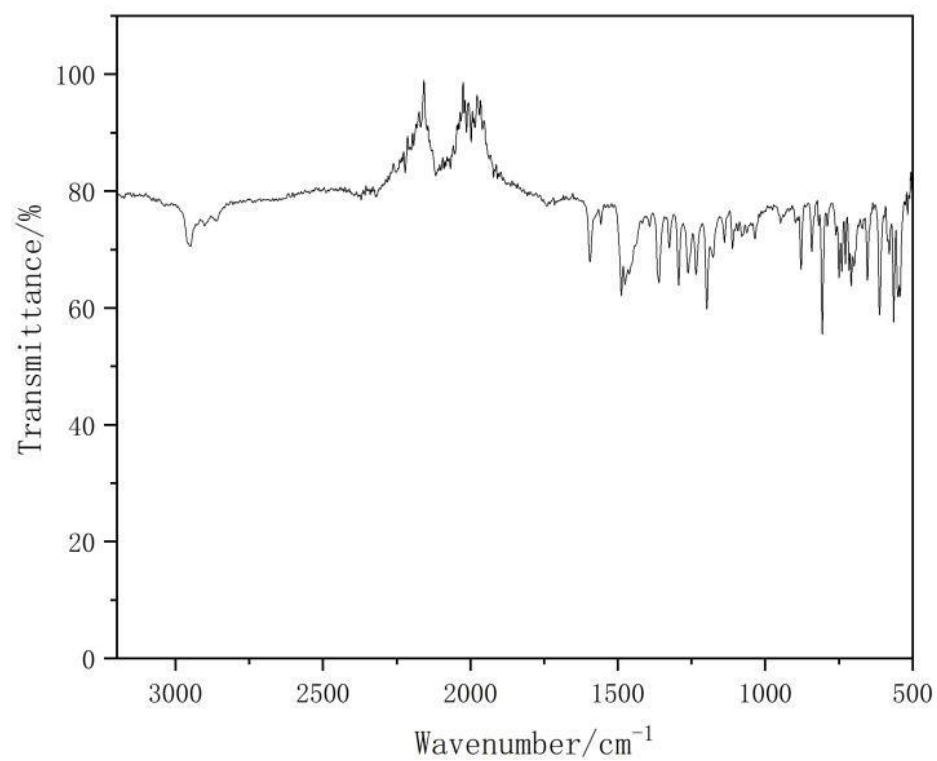

**Figure S14 7-Br**

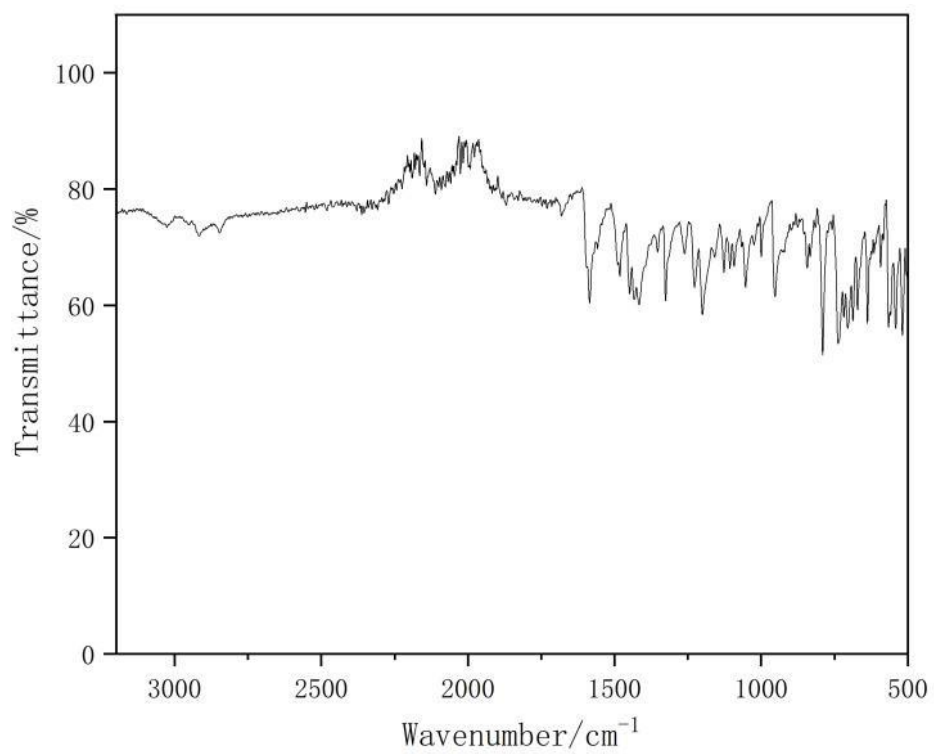

**Figure S15 7-Cz-1**

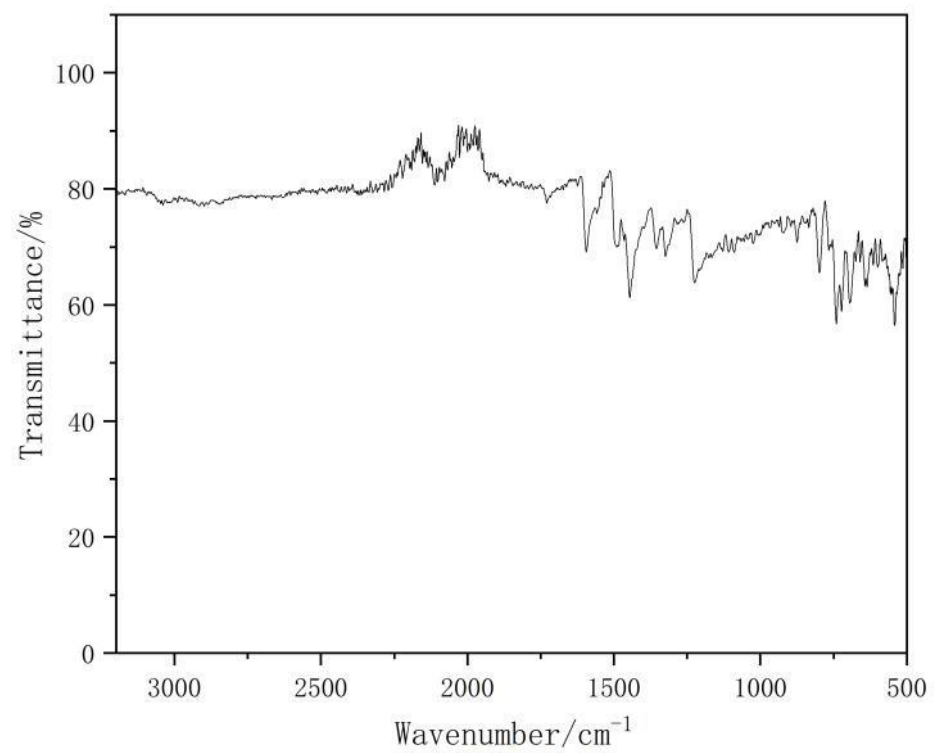



**Figure S16 7-Cz-2**

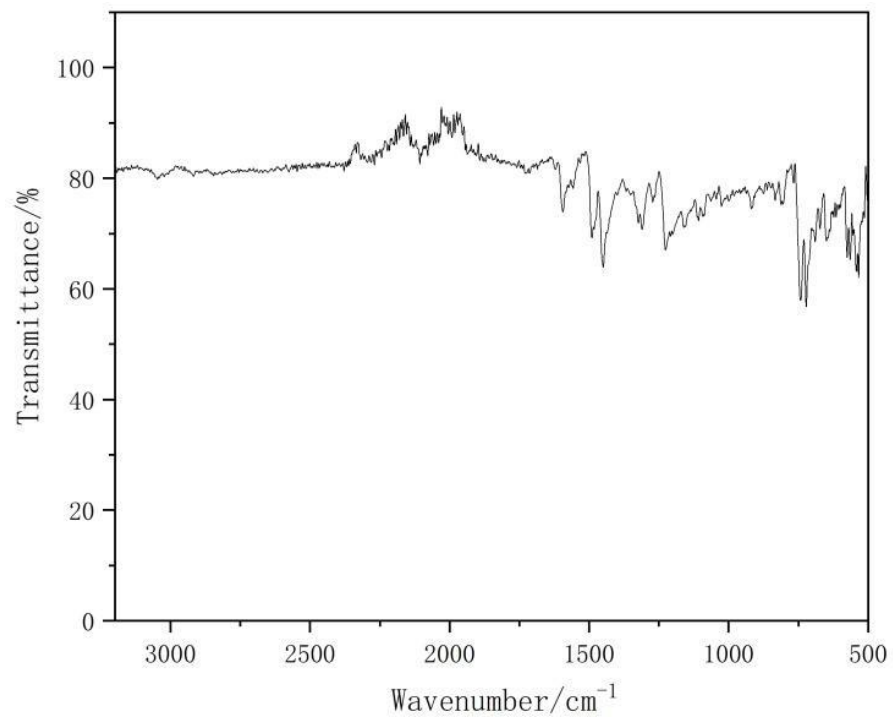

**Figure S17 7-Ph-1**

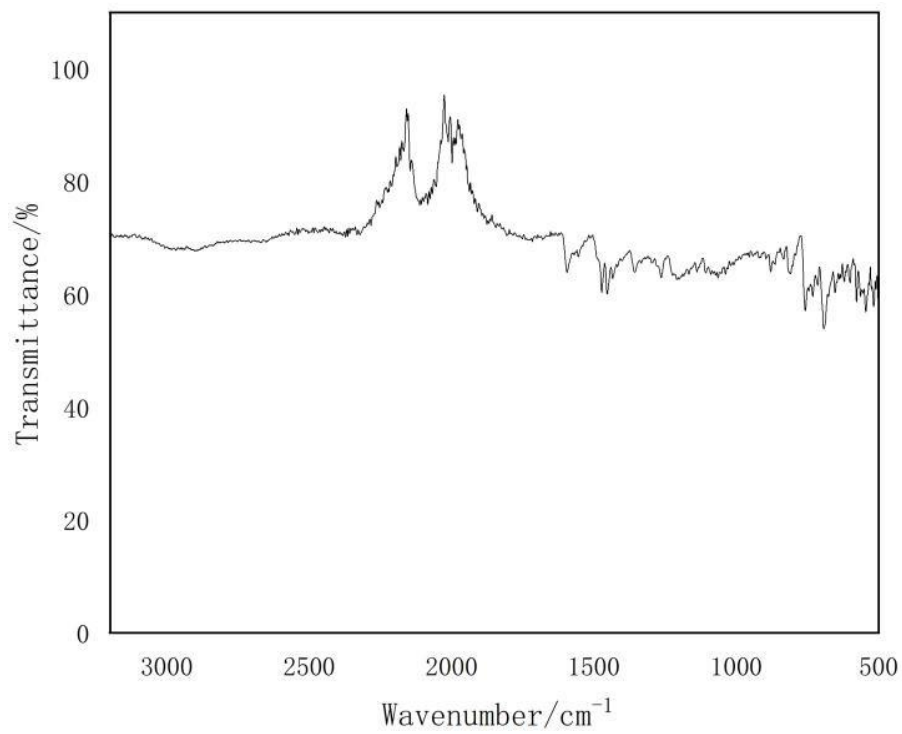

**Figure S18 7-Ph-2**

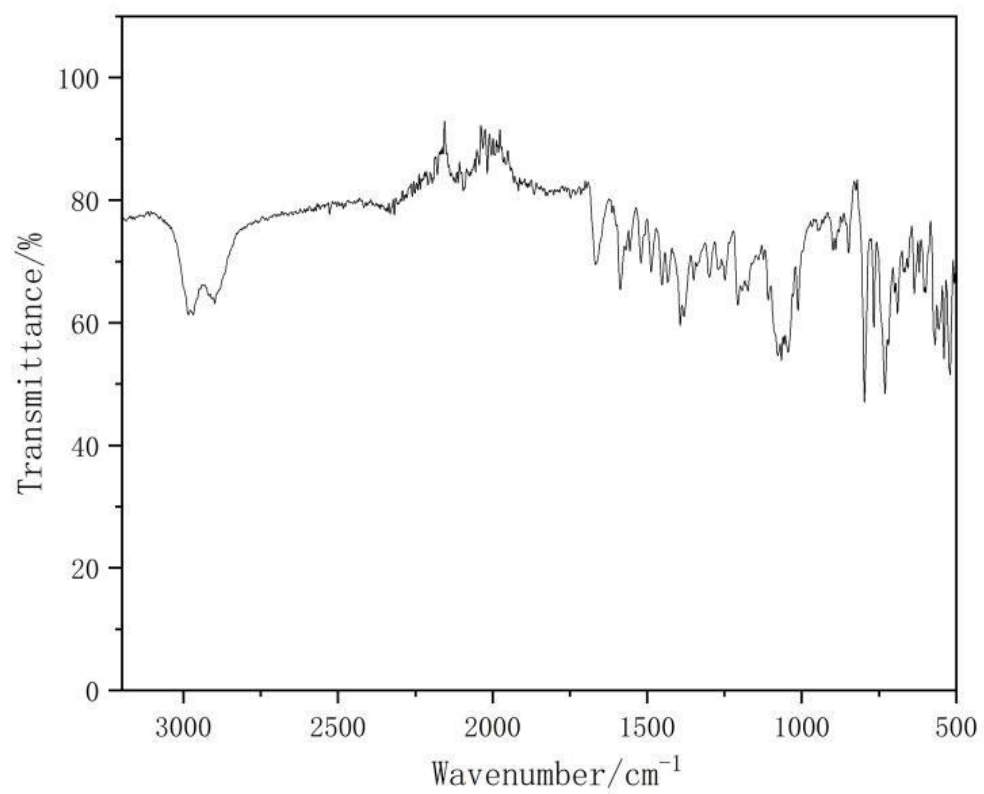

Supplement: Additional file 1 [file 1860-5397-20-274-S1.pdf]
